# Supplementary material for: β-Catenin Stabilization in Skin Fibroblasts Causes Fibrotic Lesions by Preventing Adipocyte Differentiation of the Reticular Dermis
Source: PubMed Central journal article supplement (PMC4874948; doi:10.1016/j.jid.2016.01.036), 2016-06
Supplement: mmc1.pdf [file mmc1.pdf]

## **SUPPLEMENTAL MATERIAL**

### **$\beta$ -catenin stabilization in skin fibroblasts causes fibrotic lesions by preventing adipocyte differentiation of the reticular dermis**

Maria Mastrogiannaki<sup>1,2,3</sup>, Beate M. Lichtenberger<sup>1,2,3</sup>, Andreas Reimer<sup>1</sup>, Charlotte A. Collins<sup>2</sup>, Ryan R. Driskell<sup>1</sup> and Fiona M. Watt<sup>1\*</sup>

<sup>1</sup>Centre for Stem Cells and Regenerative Medicine, King's College London, Guy's Hospital, Great Maze Pond, London SE1 9RT, UK

<sup>2</sup> Wellcome Trust Centre for Stem Cell Research, University of Cambridge, Tennis Court Road, Cambridge CB2 1QR, UK

<sup>3</sup> Co-first authors

## **INVENTORY OF SUPPLEMENTAL MATERIAL**

**Supplementary Figure S1** Fibroblast-specific stabilization of  $\beta$ -catenin

**Supplementary Table S1** Differentially regulated genes

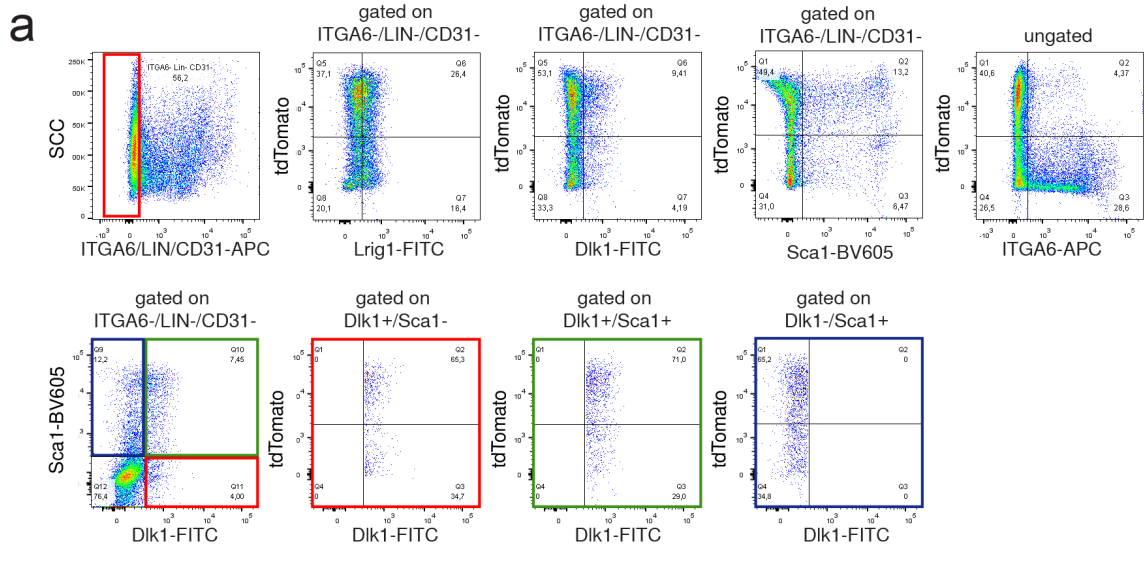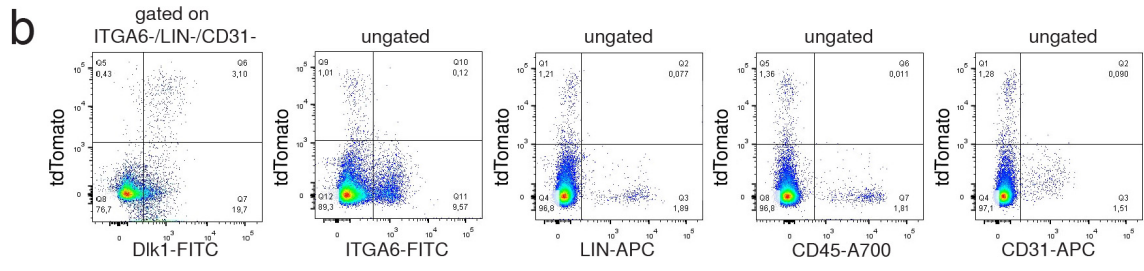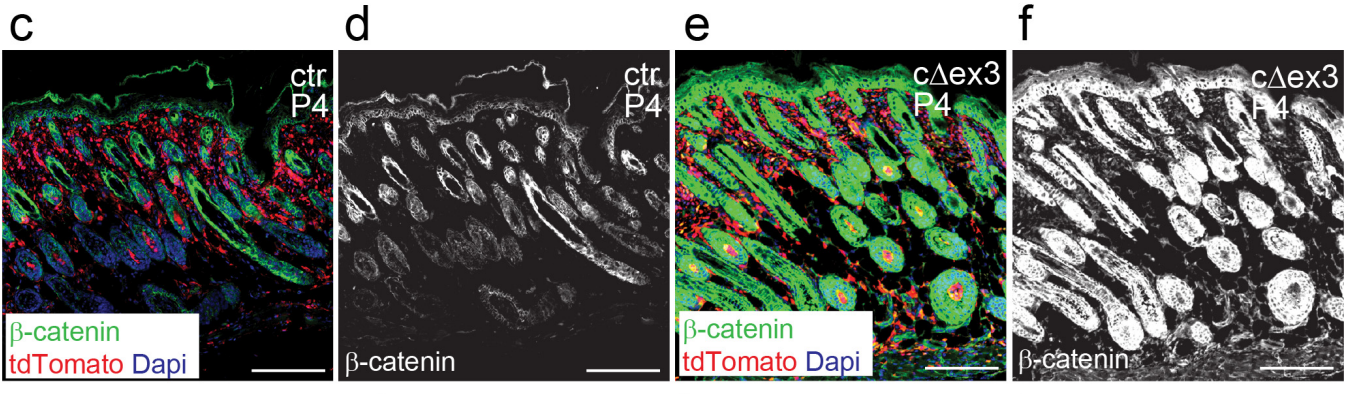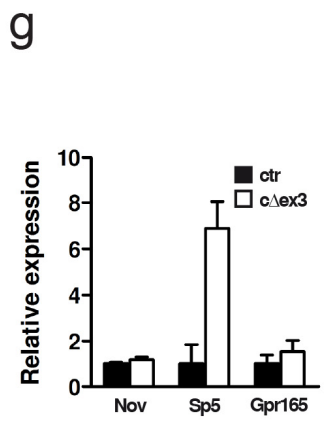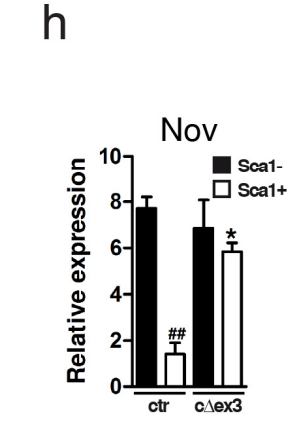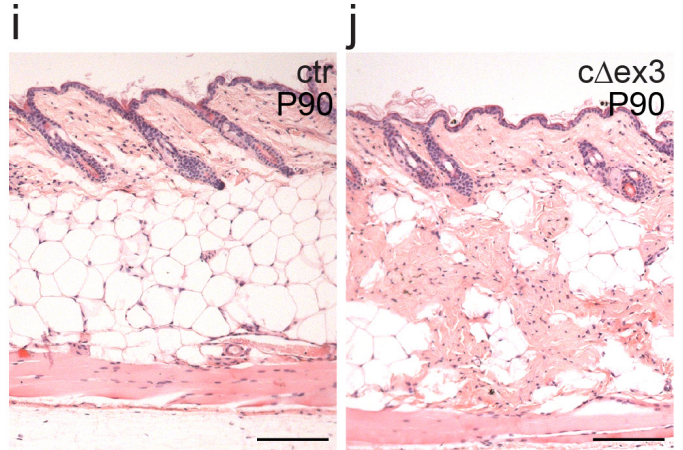

**Supplementary Figure S1. Fibroblast-specific stabilization of  $\beta$ -catenin** (a) Gating strategy for quantifying different subpopulations of tdTomato<sup>+</sup> cells in Figure 3b. Representative plots are shown. (b) Specificity of Dlk1CreER<sup>T2</sup> tdTomato lineage tracing in Figure 5b. ITGA6<sup>-</sup>/LIN<sup>-</sup>/CD31<sup>-</sup> cells were gated as in (b). Representative plots show that recombination occurs in Dlk1<sup>+</sup> fibroblasts but not in epidermal, endothelial or hematopoietic cells. (c-f) Immunofluorescent staining for  $\beta$ -catenin, tdTomato and DAPI (c, e). (d, f) show the  $\beta$ -catenin channel of images in (c, e). (g, h) Relative expression of the indicated genes in flow-sorted tdTomato<sup>+</sup> fibroblasts isolated from P4 back skin (g) and flow-sorted tdTomato<sup>+</sup>/Sca1<sup>-</sup> and tdTomato<sup>+</sup>/Sca1<sup>+</sup> fibroblasts isolated from P56 back skin. Data show means  $\pm$  SEM (n=3-4 biological samples pooled from 2-4 animals). \* p $\leq$ 0.05 compared to Sca1<sup>+</sup> control fibroblasts; ## p $\leq$ 0.005 compared to Sca1<sup>-</sup> control fibroblasts. (i, j) H&E stained sections of back skin of P90 mice of the genotypes indicated. Note that the hair follicles are in telogen, even though there is an evident reduction in the adipocyte layers on expression of stabilized  $\beta$ -catenin via Pdgfr $\alpha$ CreER<sup>T2</sup>. Scale bars: 200  $\mu$ m.

**Supplementary Table S1. Differentially regulated genes in Pdgfr $\alpha$ EGFP<sup>+</sup>/Sca1<sup>+</sup> fibroblasts** The list of entities is compiled from genes that are differentially regulated in Pdgfr $\alpha$ EGFP<sup>+</sup>/Sca1<sup>+</sup> fibroblasts compared to Pdgfr $\alpha$ EGFP<sup>+</sup>/Sca1<sup>-</sup> (T test p<0.05, fold change >2). Some genes are represented by more than one entity. Entities are ranked by fold change and grouped according to positive (up, red) or negative (down, blue) regulation.

Table S1

Differentially regulated genes in PdgfraEGFP+/ Sca1+ adipogenic fibroblasts (T test p&lt;0.05, fold change &gt;2).

| Gene Symbol                           | Entrez Gene | Gene Title                                            | Probe Set ID | Regulation | Fold Change |
|---------------------------------------|-------------|-------------------------------------------------------|--------------|------------|-------------|
| Bmper                                 | 73230       | BMP-binding endothelial regulator                     | 1429273_at   | up         | 27,14704    |
| BB144871                              | 101918      | expressed sequence BB144871                           | 1436453_at   | up         | 18,301313   |
| 4921521F21Rik                         | 70861       | RIKEN cDNA 4921521F21 gene                            | 1423381_at   | up         | 17,208042   |
| Adipoq                                | 11450       | adiponectin, C1Q and collagen domain contain          | 1422651_at   | up         | 16,132975   |
| Ly6a                                  | 110454      | lymphocyte antigen 6 complex, locus A                 | 1417185_at   | up         | 16,116531   |
| Fzd4                                  | 14366       | frizzled homolog 4 (Drosophila)                       | 1449416_at   | up         | 15,118653   |
| Chrdl1                                | 83453       | chordin-like 1                                        | 1434201_at   | up         | 14,37288    |
| Fzd4                                  | 14366       | frizzled homolog 4 (Drosophila)                       | 1419301_at   | up         | 12,178625   |
| AI607873                              | 226691      | expressed sequence AI607873                           | 1457035_at   | up         | 10,661243   |
| Cd36                                  | 12491       | CD36 antigen                                          | 1450883_a_at | up         | 10,644925   |
| C1s /// LOC100044326                  | 100044326   | // complement component 1, s subcomponent /,          | 1424041_s_at | up         | 10,448336   |
| Ms4a4d                                | 66607       | membrane-spanning 4-domains, subfamily A,             | 1418990_at   | up         | 10,355799   |
| Car3                                  | 12350       | carbonic anhydrase 3                                  | 1449434_at   | up         | 10,344274   |
| Esr1                                  | 13982       | estrogen receptor 1 (alpha)                           | 1435663_at   | up         | 10,2470875  |
| Cxcl1                                 | 14825       | chemokine (C-X-C motif) ligand 1                      | 1419209_at   | up         | 10,177192   |
| Slco2b1                               | 101488      | solute carrier organic anion transporter family       | 1433933_s_at | up         | 10,113922   |
| Akap12                                | 83397       | A kinase (PRKA) anchor protein (gravin) 12            | 1419706_a_at | up         | 10,016486   |
| Kcnj8                                 | 16523       | potassium inwardly-rectifying channel, subfar         | 1418142_at   | up         | 9,899502    |
| Fmod                                  | 14264       | fibromodulin                                          | 1456084_x_at | up         | 9,702447    |
| Nell1                                 | 338352      | NEL-like 1 (chicken)                                  | 1433787_at   | up         | 9,688301    |
| Scn7a                                 | 20272       | sodium channel, voltage-gated, type VII, alph         | 1436043_at   | up         | 9,442539    |
| Rbp4                                  | 19662       | retinol binding protein 4, plasma                     | 1426225_at   | up         | 8,717569    |
| Cd36                                  | 12491       | CD36 antigen                                          | 1423166_at   | up         | 8,633587    |
| 100040462 /// Ifi203 /// If 100040462 | 100040462   | // predicted gene, 100040462 /// interferon acti      | 1452348_s_at | up         | 8,572408    |
| Zcchc5                                | 213436      | zinc finger, CCHC domain containing 5                 | 1437355_at   | up         | 8,432949    |
| C1r                                   | 50909       | complement component 1, r subcomponent                | 1417009_at   | up         | 8,374341    |
| Esr1                                  | 13982       | estrogen receptor 1 (alpha)                           | 1460591_at   | up         | 8,108602    |
| 5430421B17                            | 330593      | hypothetical protein 5430421B17                       | 1434756_at   | up         | 8,048973    |
| Agtr2                                 | 11609       | angiotensin II receptor, type 2                       | 1415832_at   | up         | 7,8949695   |
| Lpl                                   | 16956       | lipoprotein lipase                                    | 1431056_a_at | up         | 7,7214975   |
| Figf /// LOC100047108                 | 100047108   | // c-fos induced growth factor /// similar to FIGF    | 1438953_at   | up         | 7,6774178   |
| Ldb2                                  | 16826       | LIM domain binding 2                                  | 1456786_at   | up         | 7,6740522   |
| Fabp4                                 | 11770       | fatty acid binding protein 4, adipocyte               | 1417023_a_at | up         | 7,6263037   |
| Figf                                  | 14205       | c-fos induced growth factor                           | 1438954_x_at | up         | 7,602751    |
| Serpina3n                             | 20716       | serine (or cysteine) peptidase inhibitor, clade       | 1419100_at   | up         | 7,559107    |
| 667277 /// C1r                        | 50909       | /// 667 predicted gene, 667277 /// complement com     | 1456437_x_at | up         | 7,4601974   |
| Atp1a2                                | 98660       | ATPase, Na+/K+ transporting, alpha 2 polype           | 1443823_s_at | up         | 7,452678    |
| Cxcl1                                 | 14825       | chemokine (C-X-C motif) ligand 1                      | 1441855_x_at | up         | 7,4385967   |
| Zfxh4                                 | 80892       | zinc finger homeodomain 4                             | 1421433_at   | up         | 7,1405125   |
| Mfap5                                 | 50530       | microfibrillar associated protein 5                   | 1418454_at   | up         | 7,113682    |
| Acaa1b                                | 235674      | acetyl-Coenzyme A acyltransferase 1B                  | 1424451_at   | up         | 6,887252    |
| Clec2d                                | 93694       | C-type lectin domain family 2, member d               | 1419477_at   | up         | 6,7683125   |
| Cxcl1                                 | 14825       | chemokine (C-X-C motif) ligand 1                      | 1457644_s_at | up         | 6,745072    |
| DIK1                                  | 13386       | delta-like 1 homolog (Drosophila)                     | 1449939_s_at | up         | 6,682756    |
| Ifi204                                | 15951       | interferon activated gene 204                         | 1419603_at   | up         | 6,6689963   |
| Ldb2                                  | 16826       | LIM domain binding 2                                  | 1439557_s_at | up         | 6,5811977   |
| Efemp1                                | 216616      | epidermal growth factor-containing fibulin-like       | 1427183_at   | up         | 6,355791    |
| Fabp4                                 | 11770       | fatty acid binding protein 4, adipocyte               | 1425809_at   | up         | 6,318707    |
| Ifi205 /// Mnda                       | 226695      | /// 38 interferon activated gene 205 /// myeloid cell | 1452349_x_at | up         | 6,3019567   |
| Aoc3                                  | 11754       | amine oxidase, copper containing 3                    | 1449396_at   | up         | 6,247015    |
| Mc2r                                  | 17200       | melanocortin 2 receptor                               | 1422926_at   | up         | 6,1915946   |
| Chrdl1                                | 83453       | chordin-like 1                                        | 1456722_at   | up         | 6,189348    |
| Epha3                                 | 13837       | Eph receptor A3                                       | 1425575_at   | up         | 6,15246     |
| LOC100045833 /// Ly6c1 / 100041546    | 100041546   | // similar to Lymphocyte antigen 6C precursor (l      | 1421571_a_at | up         | 6,0910254   |
| Abcc9                                 | 20928       | ATP-binding cassette, sub-family C (CFTR/MR           | 1420408_a_at | up         | 6,087254    |
| Lrrtm1                                | 74342       | leucine rich repeat transmembrane neuronal            | 1455883_a_at | up         | 6,072831    |
| Cd36                                  | 12491       | CD36 antigen                                          | 1450884_at   | up         | 6,015234    |
| Esr1                                  | 13982       | estrogen receptor 1 (alpha)                           | 1421244_at   | up         | 5,9748487   |
| Tfpi2                                 | 21789       | tissue factor pathway inhibitor 2                     | 1418547_at   | up         | 5,9365153   |
| Adamts1                               | 77739       | ADAMTS-like 1                                         | 1442063_at   | up         | 5,9051614   |
| Atp1a2                                | 98660       | ATPase, Na+/K+ transporting, alpha 2 polype           | 1434893_at   | up         | 5,8637347   |
| Ccl11                                 | 20292       | chemokine (C-C motif) ligand 11                       | 1417789_at   | up         | 5,858775    |
| Lgr5                                  | 14160       | leucine rich repeat containing G protein coupl        | 1450988_at   | up         | 5,855163    |
| Lgals3bp                              | 19039       | lectin, galactoside-binding, soluble, 3 binding       | 1448380_at   | up         | 5,8506083   |
| Nrk                                   | 27206       | Nik related kinase                                    | 1450079_at   | up         | 5,792295    |
| Adh1                                  | 11522       | alcohol dehydrogenase 1 (class I)                     | 1416225_at   | up         | 5,779169    |
| Ntrk3                                 | 18213       | neurotrophic tyrosine kinase, receptor, type 3        | 1443970_at   | up         | 5,758859    |
| Plat                                  | 18791       | plasminogen activator, tissue                         | 1415806_at   | up         | 5,7580934   |
| Serping1                              | 12258       | serine (or cysteine) peptidase inhibitor, clade       | 1416625_at   | up         | 5,562655    |

|                                                                                  |                                                                            |              |           |           |
|----------------------------------------------------------------------------------|----------------------------------------------------------------------------|--------------|-----------|-----------|
| Parp3                                                                            | 235587 poly (ADP-ribose) polymerase family, membe                          | 1426210_x_at | up        | 5,543732  |
| Pparg                                                                            | 19016 peroxisome proliferator activated receptor gai                       | 1420715_a_at | up        | 5,523724  |
| Nrk                                                                              | 27206 Nik related kinase                                                   | 1450078_at   | up        | 5,5109053 |
| Tmeff2                                                                           | 56363 transmembrane protein with EGF-like and twc                          | 1419073_at   | up        | 5,415139  |
| Prelp                                                                            | 116847 proline arginine-rich end leucine-rich repeat                       | 1416321_s_at | up        | 5,41482   |
| Cxcl12                                                                           | 20315 chemokine (C-X-C motif) ligand 12                                    | 1448823_at   | up        | 5,4073114 |
| Chrdl1                                                                           | 83453 chordin-like 1                                                       | 1421295_at   | up        | 5,381881  |
| Epha3                                                                            | 13837 Eph receptor A3                                                      | 1455426_at   | up        | 5,357103  |
| Serpina3c                                                                        | 16625 serine (or cysteine) peptidase inhibitor, clade                      | 1421564_at   | up        | 5,3193135 |
| Figf                                                                             | 14205 c-fos induced growth factor                                          | 1449528_at   | up        | 5,3093524 |
| Parp3                                                                            | 235587 poly (ADP-ribose) polymerase family, membe                          | 1451969_s_at | up        | 5,2564473 |
| Chrdl1                                                                           | 83453 chordin-like 1                                                       | 1424945_at   | up        | 5,2362556 |
| Nrk                                                                              | 27206 Nik related kinase                                                   | 1436399_s_at | up        | 5,1634164 |
| Mfap5                                                                            | 50530 microfibrillar associated protein 5                                  | 1449082_at   | up        | 5,1602807 |
| Mgst1                                                                            | 56615 microsomal glutathione S-transferase 1                               | 1415897_a_at | up        | 5,1572347 |
| Osmr                                                                             | 18414 oncostatin M receptor                                                | 1418675_at   | up        | 5,156055  |
| Cygb                                                                             | 114886 cytoglobin                                                          | 1423630_at   | up        | 5,1455917 |
| Iigp1                                                                            | 60440 interferon inducible GTPase 1                                        | 1419043_a_at | up        | 5,139909  |
| Fndc1                                                                            | 68655 fibronectin type III domain containing 1                             | 1453321_at   | up        | 5,1210327 |
| Serpinf1                                                                         | 20317 serine (or cysteine) peptidase inhibitor, clade                      | 1453724_a_at | up        | 5,112359  |
| Igfbp7                                                                           | 29817 insulin-like growth factor binding protein 7                         | 1423584_at   | up        | 5,0641994 |
| Hmga2-ps1                                                                        | 15365 high mobility group AT-hook 2, pseudogene 1                          | 1440559_at   | up        | 4,93284   |
| Ifi203                                                                           | 15950 interferon activated gene 203                                        | 1452231_x_at | up        | 4,9315233 |
| Gpr133                                                                           | 243277 G protein-coupled receptor 133                                      | 1455466_at   | up        | 4,912697  |
| Prelp                                                                            | 116847 proline arginine-rich end leucine-rich repeat                       | 1416322_at   | up        | 4,901169  |
| Zfx4                                                                             | 80892 zinc finger homeodomain 4                                            | 1437556_at   | up        | 4,8906484 |
| A530020G20Rik                                                                    | 319839 RIKEN cDNA A530020G20 gene                                          | 1442580_at   | up        | 4,8489046 |
| Ldb2                                                                             | 16826 LIM domain binding 2                                                 | 1421101_a_at | up        | 4,84303   |
| Atp1a2                                                                           | 98660 ATPase, Na <sup>+</sup> /K <sup>+</sup> transporting, alpha 2 polype | 1427465_at   | up        | 4,78578   |
| Aldh1a1                                                                          | 11668 aldehyde dehydrogenase family 1, subfamily                           | 1416468_at   | up        | 4,7747602 |
| Hpgd                                                                             | 15446 hydroxyprostaglandin dehydrogenase 15 (NAI                           | 1419905_s_at | up        | 4,7588973 |
| Hic1                                                                             | 15248 hypermethylated in cancer 1                                          | 1449226_at   | up        | 4,715873  |
| Hrct1                                                                            | 100039781 histidine rich carboxyl terminus 1                               | 1429018_at   | up        | 4,7117043 |
| Ifi203                                                                           | 15950 interferon activated gene 203                                        | 1425008_a_at | up        | 4,6957593 |
| Hpgd                                                                             | 15446 Hydroxyprostaglandin dehydrogenase 15 (NA                            | 1419906_at   | up        | 4,6685324 |
| 1700112E06Rik                                                                    | 76633 RIKEN cDNA 1700112E06 gene                                           | 1430886_at   | up        | 4,6549993 |
| Tnxb                                                                             | 81877 tenascin XB                                                          | 1450798_at   | up        | 4,627588  |
| EG328264                                                                         | 328264 predicted gene, EG328264                                            | 1459259_at   | up        | 4,589858  |
| Ctsh                                                                             | 13036 cathepsin H                                                          | 1443814_x_at | up        | 4,5242057 |
| Lpl                                                                              | 16956 lipoprotein lipase                                                   | 1415904_at   | up        | 4,494355  |
| Adam23 /// LOC10004603:100046035 ///a disintegrin and metallopeptidase domain 23 | 1423378_at                                                                 | up           | 4,4200745 |           |
| Rassf2                                                                           | 215653 Ras association (RalGDS/AF-6) domain family                         | 1428392_at   | up        | 4,3245516 |
| Atp8b1                                                                           | 54670 ATPase, class I, type 8B, member 1                                   | 1455396_at   | up        | 4,3231254 |
| Calcr1                                                                           | 54598 calcitonin receptor-like                                             | 1425814_a_at | up        | 4,3150687 |
| Angptl4                                                                          | 57875 angiopoietin-like 4                                                  | 1453410_at   | up        | 4,2794147 |
| Fap                                                                              | 14089 fibroblast activation protein                                        | 1417552_at   | up        | 4,261906  |
| Rtn4rl1                                                                          | 237847 reticulon 4 receptor-like 1                                         | 1436868_at   | up        | 4,248162  |
|                                                                                  |                                                                            | 1444767_at   | up        | 4,247442  |
| Adrb1                                                                            | 11554 adrenergic receptor, beta 1                                          | 1423420_at   | up        | 4,22082   |
|                                                                                  |                                                                            | 1457877_at   | up        | 4,220345  |
| Sdpr                                                                             | 20324 serum deprivation response                                           | 1443832_s_at | up        | 4,2172365 |
| Gstm2                                                                            | 14863 glutathione S-transferase, mu 2                                      | 1416411_at   | up        | 4,216173  |
| Adam23                                                                           | 23792 a disintegrin and metallopeptidase domain 23                         | 1447946_at   | up        | 4,1744747 |
| Ctsh                                                                             | 13036 cathepsin H                                                          | 1418365_at   | up        | 4,1694384 |
| Ephx2                                                                            | 13850 epoxide hydrolase 2, cytoplasmic                                     | 1448499_a_at | up        | 4,1521993 |
| Fmo1                                                                             | 14261 flavin containing monooxygenase 1                                    | 1417429_at   | up        | 4,1405835 |
| Pappa2                                                                           | 23850 pappalysin 2                                                         | 1444451_at   | up        | 4,1380935 |
| Cyr61                                                                            | 16007 cysteine rich protein 61                                             | 1438133_a_at | up        | 4,118732  |
| Steap3                                                                           | 68428 STEAP family member 3                                                | 1430355_a_at | up        | 4,1047072 |
| Osmr                                                                             | 18414 oncostatin M receptor                                                | 1418674_at   | up        | 4,0872116 |
| Cmah                                                                             | 12763 cytidine monophospho-N-acetylneuraminic ac                           | 1428043_a_at | up        | 4,0767946 |
| Itm2a                                                                            | 16431 integral membrane protein 2A                                         | 1423608_at   | up        | 4,074737  |
| Il31ra                                                                           | 218624 interleukin 31 receptor A                                           | 1451535_at   | up        | 4,0732465 |
| Bdkrb2                                                                           | 12062 Bradykinin receptor, beta 2 (Bdkrb2), mRNA                           | 1442187_at   | up        | 4,0623283 |
| Pcolce                                                                           | 18542 procollagen C-endopeptidase enhancer protei                          | 1448433_a_at | up        | 4,030286  |
| Tek                                                                              | 21687 endothelial-specific receptor tyrosine kinase                        | 1418788_at   | up        | 4,0298963 |
| Dpep1                                                                            | 13479 dipeptidase 1 (renal)                                                | 1419674_a_at | up        | 4,0170083 |
| Scn7a                                                                            | 20272 sodium channel, voltage-gated, type VII, alpr                        | 1436044_at   | up        | 4,0156136 |
| Gda                                                                              | 14544 guanine deaminase                                                    | 1435749_at   | up        | 4,013352  |
| Mmp19                                                                            | 58223 matrix metallopeptidase 19                                           | 1421976_at   | up        | 3,981666  |
| Ntrk3                                                                            | 18213 neurotrophic tyrosine kinase, receptor, type 3                       | 1433825_at   | up        | 3,977062  |
| Adamts1                                                                          | 77739 ADAMTS-like 1                                                        | 1430313_at   | up        | 3,974646  |
| Cp                                                                               | 12870 ceruloplasmin                                                        | 1417494_a_at | up        | 3,972882  |
| C1qtnf3                                                                          | 81799 C1q and tumor necrosis factor related protein                        | 1422606_at   | up        | 3,9705317 |

|                                                                               |                                                          |              |    |           |
|-------------------------------------------------------------------------------|----------------------------------------------------------|--------------|----|-----------|
| Fabp4                                                                         | 11770 fatty acid binding protein 4, adipocyte            | 1451263_a_at | up | 3,9685102 |
| Nupr1                                                                         | 56312 nuclear protein 1                                  | 1419665_a_at | up | 3,9595222 |
|                                                                               |                                                          | 1442025_a_at | up | 3,9378865 |
| Mpa2l                                                                         | 100702 macrophage activation 2 like                      | 1438676_at   | up | 3,9218245 |
| 5031426D15Rik                                                                 | 68144 RIKEN cDNA 5031426D15 gene                         | 1431248_at   | up | 3,91754   |
| Gucy1a3                                                                       | 60596 guanylate cyclase 1, soluble, alpha 3              | 1420534_at   | up | 3,8879724 |
| Tusc5                                                                         | 237858 tumor suppressor candidate 5                      | 1441096_at   | up | 3,8748946 |
| Slc1a3                                                                        | 20512 solute carrier family 1 (glial high affinity gluta | 1426340_at   | up | 3,8738167 |
| Cmah                                                                          | 12763 cytidine monophospho-N-acetylneuraminic ac         | 1421214_at   | up | 3,866772  |
| Ptger4                                                                        | 19219 prostaglandin E receptor 4 (subtype EP4)           | 1421073_a_at | up | 3,8659325 |
|                                                                               |                                                          | 1458830_at   | up | 3,842953  |
| Nupr1                                                                         | 56312 nuclear protein 1                                  | 1419666_x_at | up | 3,8193142 |
| Cdkn1c                                                                        | 12577 cyclin-dependent kinase inhibitor 1C (P57)         | 1417649_at   | up | 3,8065464 |
| Ptgfr                                                                         | 19220 prostaglandin F receptor                           | 1446331_at   | up | 3,7845705 |
| Klhl13                                                                        | 67455 kelch-like 13 (Drosophila)                         | 1448269_a_at | up | 3,7767868 |
| Csf1                                                                          | 12977 colony stimulating factor 1 (macrophage)           | 1460220_a_at | up | 3,7481172 |
| Gas6                                                                          | 14456 growth arrest specific 6                           | 1417399_at   | up | 3,745816  |
| Dapk1                                                                         | 69635 death associated protein kinase 1                  | 1427358_a_at | up | 3,733323  |
|                                                                               |                                                          | 1443007_at   | up | 3,7240856 |
| Klhl13                                                                        | 67455 kelch-like 13 (Drosophila)                         | 1416242_at   | up | 3,704093  |
| H2-Q10                                                                        | 15007 histocompatibility 2, Q region locus 10            | 1425137_a_at | up | 3,68651   |
| Ccdc80                                                                        | 67896 coiled-coil domain containing 80                   | 1424187_at   | up | 3,6658614 |
| Gpd1                                                                          | 14555 glycerol-3-phosphate dehydrogenase 1 (solub        | 1416204_at   | up | 3,6570053 |
| Adam12                                                                        | 11489 a disintegrin and metallopeptidase domain 12       | 1421172_at   | up | 3,6525865 |
| Klf14                                                                         | 619665 Kruppel-like factor 14                            | 1457397_at   | up | 3,6475642 |
| 6530401D17Rik                                                                 | 76219 RIKEN cDNA 6530401D17 gene                         | 1451679_at   | up | 3,626804  |
| Lgals9                                                                        | 16859 lectin, galactose binding, soluble 9               | 1421217_a_at | up | 3,6264517 |
| Hsd11b2                                                                       | 15484 hydroxysteroid 11-beta dehydrogenase 2             | 1416761_at   | up | 3,617153  |
| Ltbp2                                                                         | 16997 latent transforming growth factor beta binding     | 1418061_at   | up | 3,6016116 |
| Trim9                                                                         | 94090 tripartite motif-containing 9                      | 1434249_s_at | up | 3,5907178 |
| Sdpr                                                                          | 20324 serum deprivation response                         | 1416779_at   | up | 3,5722156 |
| Ly6e                                                                          | 17069 lymphocyte antigen 6 complex, locus E              | 1453304_s_at | up | 3,560402  |
| Ang                                                                           | 11727 angiogenin, ribonuclease, RNase A family, 5        | 1438937_x_at | up | 3,5559647 |
| Col15a1                                                                       | 12819 collagen, type XV, alpha 1                         | 1448755_at   | up | 3,5507078 |
| Olfml1                                                                        | 244198 olfactomedin-like 1                               | 1455663_at   | up | 3,546517  |
| Slc40a1                                                                       | 53945 solute carrier family 40 (iron-regulated transp    | 1448566_at   | up | 3,5454712 |
| Itm2a                                                                         | 16431 integral membrane protein 2A                       | 1451047_at   | up | 3,5412915 |
| Egr1                                                                          | 13653 early growth response 1                            | 1417065_at   | up | 3,5284483 |
| Ablim1                                                                        | 226251 actin-binding LIM protein 1                       | 1453103_at   | up | 3,5256581 |
| Itgbl1                                                                        | 223272 integrin, beta-like 1                             | 1425039_at   | up | 3,5249536 |
| Slc40a1                                                                       | 53945 solute carrier family 40 (iron-regulated transp    | 1417061_at   | up | 3,524047  |
| Thbs1                                                                         | 21825 thrombospondin 1                                   | 1460302_at   | up | 3,5154676 |
| Ntrk3                                                                         | 18213 neurotrophic tyrosine kinase, receptor, type 3     | 1425070_at   | up | 3,5122695 |
| Mmp19                                                                         | 58223 matrix metallopeptidase 19                         | 1421977_at   | up | 3,5067005 |
| Cxcl10                                                                        | 15945 chemokine (C-X-C motif) ligand 10                  | 1418930_at   | up | 3,4980295 |
| Zfp385a                                                                       | 29813 zinc finger protein 385A                           | 1418865_at   | up | 3,4744093 |
| ENSMUSG00000043248 //, 100039175 //, predicted gene, ENSMUSG00000043248 /// p |                                                          | 1458659_at   | up | 3,4681306 |
| Ntrk3                                                                         | 18213 neurotrophic tyrosine kinase, receptor, type 3     | 1425071_s_at | up | 3,4678326 |
| Ptger3                                                                        | 19220 prostaglandin F receptor                           | 1453924_a_at | up | 3,4618323 |
| Slc1a3                                                                        | 20512 solute carrier family 1 (glial high affinity gluta | 1452031_at   | up | 3,4571385 |
| Abcc9                                                                         | 20928 ATP-binding cassette, sub-family C (CFTR/MR        | 1435751_at   | up | 3,417256  |
| Pdpr                                                                          | 14726 podoplanin                                         | 1419309_at   | up | 3,4048033 |
|                                                                               |                                                          | 1446659_at   | up | 3,4046845 |
| Nova1                                                                         | 664883 neuro-oncological ventral antigen 1               | 1426938_at   | up | 3,4022992 |
|                                                                               |                                                          | 1458236_at   | up | 3,3991418 |
| Rarres2                                                                       | 71660 retinoic acid receptor responder (tazarotene ii    | 1428538_s_at | up | 3,3966062 |
| Epha3                                                                         | 13837 Eph receptor A3                                    | 1426057_a_at | up | 3,3774095 |
| 2900046F13Rik                                                                 | 73028 RIKEN cDNA 2900046F13 gene                         | 1432861_at   | up | 3,3744204 |
| Rarres2                                                                       | 71660 retinoic acid receptor responder (tazarotene ii    | 1437902_s_at | up | 3,3663216 |
| Steap4                                                                        | 117167 STEAP family member 4                             | 1425829_a_at | up | 3,3491008 |
| Dlk1                                                                          | 13386 delta-like 1 homolog (Drosophila)                  | 1442724_at   | up | 3,3386    |
| Agtr1a                                                                        | 11607 angiotensin II receptor, type 1a                   | 1436739_at   | up | 3,3361428 |
| Zbtb16                                                                        | 235320 zinc finger and BTB domain containing 16          | 1419874_x_at | up | 3,332064  |
| Col5a3                                                                        | 53867 collagen, type V, alpha 3                          | 1419703_at   | up | 3,3200917 |
| Cyr61                                                                         | 16007 cysteine rich protein 61                           | 1416039_x_at | up | 3,3016484 |
| Ptgir                                                                         | 19222 prostaglandin I receptor (IP)                      | 1427313_at   | up | 3,296893  |
| Dapk1                                                                         | 69635 death associated protein kinase 1                  | 1426915_at   | up | 3,2940066 |
| Ogn                                                                           | 18295 osteoglycin                                        | 1419662_at   | up | 3,2930143 |
| Slc38a4                                                                       | 69354 solute carrier family 38, member 4                 | 1428111_at   | up | 3,2899382 |
| Lgr5                                                                          | 14160 leucine rich repeat containing G protein coupl     | 1444519_at   | up | 3,286038  |
| Ptger3                                                                        | 19218 prostaglandin E receptor 3 (subtype EP3)           | 1450344_a_at | up | 3,274178  |
| Slc10a6                                                                       | 75750 solute carrier family 10 (sodium/bile acid cotr    | 1428776_at   | up | 3,2636373 |
| Depdc6                                                                        | 97998 DEP domain containing 6                            | 1451348_at   | up | 3,2567399 |
| Ptgfr                                                                         | 19220 prostaglandin F receptor                           | 1420349_at   | up | 3,2464437 |

|                    |             |                                                   |              |    |             |
|--------------------|-------------|---------------------------------------------------|--------------|----|-------------|
| Ripply3            | 170765      | rippy3 homolog (zebrafish)                        | 1420459_at   | up | 3,2420065   |
| Sh3gl2             | 20404       | SH3-domain GRB2-like 2                            | 1418791_at   | up | 3,2380815   |
| Tmem135            | 72759       | transmembrane protein 135                         | 1426435_at   | up | 3,2342296   |
| Ecm1               | 13601       | extracellular matrix protein 1                    | 1448613_at   | up | 3,221523    |
| Prr16              | 71373       | proline rich 16                                   | 1431109_at   | up | 3,2213507   |
| Cp                 | 12870       | ceruloplasmin                                     | 1448734_at   | up | 3,2197087   |
| Ldhb               | 16832       | lactate dehydrogenase B                           | 1434499_a_at | up | 3,211863    |
| Ptger4             | 19219       | prostaglandin E receptor 4 (subtype EP4)          | 1424208_at   | up | 3,2012646   |
| Fank1              | 66930       | fibronectin type 3 and ankyrin repeat domain:     | 1447495_at   | up | 3,2003927   |
|                    |             |                                                   | 1434632_at   | up | 3,193838    |
| Man1a              | 17155       | mannosidase 1, alpha                              | 1417110_at   | up | 3,1843834   |
| 2410085M17Rik      | 73706       | RIKEN cDNA 2410085M17 gene                        | 1440381_at   | up | 3,1805358   |
| Psap               | 43727,66829 | prosaposin                                        | 1415687_a_at | up | 3,179044428 |
| D530031A16Rik      | 78724       | RIKEN cDNA D530031A16 gene                        | 1433310_at   | up | 3,1696248   |
| Dpep1              | 13479       | dipeptidase 1 (renal)                             | 1435943_at   | up | 3,1255274   |
| Rnf144a            | 108089      | ring finger protein 144A                          | 1438404_at   | up | 3,1128757   |
| Dmrt2              | 226049      | doublesex and mab-3 related transcription fac     | 1426867_at   | up | 3,0973058   |
| Ppap2b             | 67916       | phosphatidic acid phosphatase type 2B             | 1448908_at   | up | 3,0812924   |
| Tppp3              | 67971       | tubulin polymerization-promoting protein fam      | 1416713_at   | up | 3,081029    |
| Nfib               | 18028       | nuclear factor I/B                                | 1427680_a_at | up | 3,0797112   |
| OTTMUSG00000002879 | 100040792   | predicted gene, OTTMUSG00000002879                | 1442917_at   | up | 3,0766215   |
| Oxtr               | 18430       | oxytocin receptor                                 | 1440888_at   | up | 3,0606337   |
| Qpct               | 70536       | glutaminyl-peptide cyclotransferase (glutamir     | 1426622_a_at | up | 3,054099    |
| Lox11              | 16949       | lysyl oxidase-like 1                              | 1436063_at   | up | 3,0504107   |
| G0s2               | 14373       | GO/G1 switch gene 2                               | 1448700_at   | up | 3,0444157   |
| Cpz                | 242939      | carboxypeptidase Z                                | 1426251_at   | up | 3,0368688   |
| Nfib               | 18028       | nuclear factor I/B                                | 1448288_at   | up | 3,0337949   |
| Slc7a10            | 53896       | solute carrier family 7 (cationic amino acid tra  | 1421093_at   | up | 3,031173    |
| Pcolce2            | 76477       | procollagen C-endopeptidase enhancer 2            | 1451527_at   | up | 3,0183113   |
| Gda                | 14544       | guanine deaminase                                 | 1422868_s_at | up | 3,015623    |
| D4Ertd103e         | 52225       | DNA segment, Chr 4, ERATO Doi 103, expres:        | 1446823_at   | up | 3,0103486   |
| Epha3              | 13837       | Eph receptor A3                                   | 1425574_at   | up | 3,0079312   |
| St6galnac5         | 26938       | ST6 (alpha-N-acetyl-neuraminy-2,3-beta-gal.       | 1419420_at   | up | 3,0051622   |
| 2900046F13Rik      | 73028       | RIKEN cDNA 2900046F13 gene                        | 1454388_at   | up | 3,0007484   |
| Gstm1              | 14862       | glutathione S-transferase, mu 1                   | 1416416_x_at | up | 3,0000951   |
| 6330406115Rik      | 70717       | RIKEN cDNA 6330406115 gene                        | 1426937_at   | up | 2,9992757   |
|                    | Mär.03      |                                                   |              |    |             |
|                    | 320253      | membrane-associated ring finger (C3HC4) 3         | 1430918_at   | up | 2,990196    |
| Kitl               | 17311       | kit ligand                                        | 1448117_at   | up | 2,9896505   |
| Cp                 | 12870       | ceruloplasmin                                     | 1417496_at   | up | 2,9878387   |
| Wisp2              | 22403       | WNT1 inducible signaling pathway protein 2        | 1419015_at   | up | 2,9857183   |
| 5730410E15Rik      | 319613      | RIKEN cDNA 5730410E15 gene                        | 1438667_at   | up | 2,985575    |
| Csf1               | 12977       | colony stimulating factor 1 (macrophage)          | 1448914_a_at | up | 2,9816747   |
|                    |             |                                                   | 1436614_at   | up | 2,9731176   |
| Fmod               | 14264       | fibromodulin                                      | 1415939_at   | up | 2,9688444   |
| Ldhb               | 16832       | lactate dehydrogenase B                           | 1448237_x_at | up | 2,9659722   |
| Plcl1              | 227120      | phospholipase C-like 1                            | 1443974_at   | up | 2,9640214   |
| Kitl               | 17311       | kit ligand                                        | 1415855_at   | up | 2,9637249   |
|                    |             |                                                   | 1447609_at   | up | 2,961126    |
| Ldhb               | 16832       | lactate dehydrogenase B                           | 1455235_x_at | up | 2,9609396   |
| Tll1               | 21892       | tolloid-like                                      | 1420753_at   | up | 2,9576426   |
| Cp                 | 12870       | ceruloplasmin                                     | 1417495_x_at | up | 2,956571    |
| Chsy3              | 78923       | chondroitin sulfate synthase 3                    | 1429417_at   | up | 2,9564142   |
| Nov                | 18133       | nephroblastoma overexpressed gene                 | 1426852_x_at | up | 2,9561706   |
| Hcfc1r1            | 353502      | host cell factor C1 regulator 1 (XPO1-depende     | 1428405_at   | up | 2,9551225   |
| Kitl               | 17311       | kit ligand                                        | 1415854_at   | up | 2,955045    |
| Bend6              | 320705      | BEN domain containing 6                           | 1434590_at   | up | 2,9500809   |
| Slc4a4             | 54403       | solute carrier family 4 (anion exchanger), me     | 1434096_at   | up | 2,9471393   |
| A530020G20Rik      | 319839      | RIKEN cDNA A530020G20 gene                        | 1444161_at   | up | 2,945125    |
| Abcc9              | 20928       | ATP-binding cassette, sub-family C (CFTR/MR       | 1435752_s_at | up | 2,9442856   |
| Ogn                | 18295       | osteoglycin                                       | 1419663_at   | up | 2,9352007   |
| Nov                | 18133       | nephroblastoma overexpressed gene                 | 1426851_a_at | up | 2,9252706   |
| 2900046L07Rik      | 73027       | RIKEN cDNA 2900046L07 gene                        | 1432944_at   | up | 2,91948     |
|                    |             |                                                   | 1445032_at   | up | 2,9194078   |
| Slco2a1            | 24059       | Solute carrier organic anion transporter family   | 1444242_at   | up | 2,9170105   |
| Tcf7l2             | 21416       | transcription factor 7-like 2, T-cell specific, H | 1429427_s_at | up | 2,91625     |
| Glt8d2             | 74782       | glycosyltransferase 8 domain containing 2         | 1429403_x_at | up | 2,9135518   |
| Rab3il1            | 74760       | RAB3A interacting protein (rabin3)-like 1         | 1456442_at   | up | 2,8949947   |
| Fmod               | 14264       | fibromodulin                                      | 1437718_x_at | up | 2,8936696   |
| Ptgr               | 19220       | prostaglandin F receptor                          | 1449828_at   | up | 2,8861766   |
| 1200002N14Rik      | 71712       | RIKEN cDNA 1200002N14 gene                        | 1424524_at   | up | 2,879142    |
| Fmod               | 14264       | fibromodulin                                      | 1437324_x_at | up | 2,878072    |
| Serpinf1           | 20317       | serine (or cysteine) peptidase inhibitor, clade   | 1416168_at   | up | 2,8732116   |
| Acot7              | 70025       | acyl-CoA thioesterase 7                           | 1417094_at   | up | 2,8722475   |
| Fth1               | 14319       | ferritin heavy chain 1                            | 1427021_s_at | up | 2,8708243   |

|                                                                                |                                                           |                                                                      |              |           |           |
|--------------------------------------------------------------------------------|-----------------------------------------------------------|----------------------------------------------------------------------|--------------|-----------|-----------|
| Atp1a2                                                                         | 98660                                                     | ATPase, Na <sup>+</sup> /K <sup>+</sup> transporting, alpha 2 polype | 1452308_a_at | up        | 2,8707504 |
| Fos                                                                            | 14281                                                     | FBJ osteosarcoma oncogene                                            | 1423100_at   | up        | 2,8682284 |
| Gstm1                                                                          | 14862                                                     | glutathione S-transferase, mu 1                                      | 1448330_at   | up        | 2,8660765 |
| Slc38a4                                                                        | 69354                                                     | solute carrier family 38, member 4                                   | 1448889_at   | up        | 2,8582819 |
| Gstm1                                                                          | 14862                                                     | glutathione S-transferase, mu 1                                      | 1425627_x_at | up        | 2,8574846 |
| Nmnat3                                                                         | 74080                                                     | nicotinamide nucleotide adenylyltransferase 3                        | 1424899_at   | up        | 2,8528845 |
| 1110002E22Rik                                                                  | 67816                                                     | RIKEN cDNA 1110002E22 gene                                           | 1447870_x_at | up        | 2,8498287 |
| Thbs3                                                                          | 21827                                                     | thrombospondin 3                                                     | 1416623_at   | up        | 2,844096  |
| Agt                                                                            | 11606                                                     | angiotensinogen (serpin peptidase inhibitor, c                       | 1423396_at   | up        | 2,8418825 |
| Rasgrf1                                                                        | 19417                                                     | RAS protein-specific guanine nucleotide-relea:                       | 1422600_at   | up        | 2,8365521 |
| Icam1                                                                          | 15894                                                     | intercellular adhesion molecule 1                                    | 1424067_at   | up        | 2,8361914 |
| Fuca2                                                                          | 66848                                                     | fucosidase, alpha-L- 2, plasma                                       | 1416046_a_at | up        | 2,8361309 |
|                                                                                |                                                           |                                                                      | 1443545_at   | up        | 2,8361042 |
| Rnf144a                                                                        | 108089                                                    | ring finger protein 144A                                             | 1421243_at   | up        | 2,8355246 |
| Igf2                                                                           | 16002                                                     | insulin-like growth factor 2                                         | 1448152_at   | up        | 2,8334653 |
| Ldhb                                                                           | 16832                                                     | lactate dehydrogenase B                                              | 1416183_a_at | up        | 2,8313613 |
| Gucy1a3                                                                        | 60596                                                     | guanylate cyclase 1, soluble, alpha 3                                | 1434141_at   | up        | 2,8232827 |
| Lama4                                                                          | 16775                                                     | laminin, alpha 4                                                     | 1424808_at   | up        | 2,8212523 |
| 2900062L11Rik /// 65304C76219 /// 769                                          | RIKEN cDNA 2900062L11 gene /// RIKEN cDN                  | 1428333_at                                                           | up           | 2,8178043 |           |
| Tnfrsf23                                                                       | 79201                                                     | tumor necrosis factor receptor superfamily, m                        | 1422101_at   | up        | 2,817308  |
| Abcd2                                                                          | 26874                                                     | ATP-binding cassette, sub-family D (ALD), me                         | 1438431_at   | up        | 2,8125045 |
| Mmp3                                                                           | 17392                                                     | matrix metalloproteinase 3                                           | 1418945_at   | up        | 2,8108034 |
| Arhgap21                                                                       | 71435                                                     | Rho GTPase activating protein 21                                     | 1428369_s_at | up        | 2,8097713 |
| Ugt1a1 /// Ugt1a10 /// Ug 22236 /// 394                                        | UDP glucuronosyltransferase 1 family, polype              | 1426260_a_at                                                         | up           | 2,8089626 |           |
| Atp1a2                                                                         | 98660                                                     | ATPase, Na <sup>+</sup> /K <sup>+</sup> transporting, alpha 2 polype | 1455136_at   | up        | 2,8070002 |
| Fmod                                                                           | 14264                                                     | fibromodulin                                                         | 1437685_x_at | up        | 2,8065066 |
| Ly86                                                                           | 17084                                                     | lymphocyte antigen 86                                                | 1422903_at   | up        | 2,80255   |
| Timp4                                                                          | 110595                                                    | tissue inhibitor of metalloproteinase 4                              | 1423405_at   | up        | 2,7959645 |
|                                                                                |                                                           |                                                                      | 1448021_at   | up        | 2,7948978 |
| Oasl2                                                                          | 23962                                                     | 2'-5' oligoadenylate synthetase-like 2                               | 1453196_a_at | up        | 2,790691  |
| Ugt1a1 /// Ugt1a10 /// Ug 22236 /// 394                                        | UDP glucuronosyltransferase 1 family, polype              | 1426261_s_at                                                         | up           | 2,785483  |           |
| LOC640441 /// Thbs1                                                            | 21825 /// 640 similar to thrombospondin 1 /// thrombospon | 1450377_at                                                           | up           | 2,7842724 |           |
| Nova1                                                                          | 664883                                                    | neuro-oncological ventral antigen 1                                  | 1452245_at   | up        | 2,7829785 |
|                                                                                |                                                           |                                                                      | 1445574_at   | up        | 2,7812672 |
| Plcl1                                                                          | 227120                                                    | phospholipase C-like 1                                               | 1445723_at   | up        | 2,7769847 |
| Pdk4                                                                           | 27273                                                     | pyruvate dehydrogenase kinase, isoenzyme 4                           | 1417273_at   | up        | 2,7758176 |
| C920025E04Rik /// H2-T2:15040 /// 667                                          | RIKEN cDNA C920025E04 gene /// histocomp                  | 1449556_at                                                           | up           | 2,7741213 |           |
| Plvap                                                                          | 84094                                                     | plasmalemma vesicle associated protein                               | 1418090_at   | up        | 2,773081  |
| Col9a1                                                                         | 12839                                                     | collagen, type IX, alpha 1                                           | 1428571_at   | up        | 2,7696385 |
| A930017M01Rik                                                                  | 239410                                                    | RIKEN cDNA A930017M01 gene                                           | 1437076_at   | up        | 2,7682357 |
| LOC640441 /// Thbs1                                                            | 21825 /// 640 similar to thrombospondin 1 /// thrombospon | 1421811_at                                                           | up           | 2,7664826 |           |
| Abca1                                                                          | 11303                                                     | ATP-binding cassette, sub-family A (ABC1), m                         | 1450392_at   | up        | 2,7549407 |
| Hspa1a                                                                         | 193740                                                    | heat shock protein 1A                                                | 1452388_at   | up        | 2,7546208 |
| Irak3                                                                          | 73914                                                     | interleukin-1 receptor-associated kinase 3                           | 1435040_at   | up        | 2,7545972 |
| Gnas                                                                           | 14683                                                     | GNAS (guanine nucleotide binding protein, al                         | 1427789_s_at | up        | 2,7491105 |
| Tcf7l2                                                                         | 21416                                                     | transcription factor 7-like 2, T-cell specific, H                    | 1425229_a_at | up        | 2,745274  |
| Gda                                                                            | 14544                                                     | guanine deaminase                                                    | 1435748_at   | up        | 2,7431464 |
| Thbs2                                                                          | 21826                                                     | thrombospondin 2                                                     | 1422571_at   | up        | 2,7427807 |
| Rnase4                                                                         | 58809                                                     | ribonuclease, RNase A family 4                                       | 1422603_at   | up        | 2,7407696 |
| Mmp23                                                                          | 26561                                                     | matrix metalloproteinase 23                                          | 1417282_at   | up        | 2,737936  |
| Angptl4                                                                        | 57875                                                     | angiopoietin-like 4                                                  | 1417130_s_at | up        | 2,7329693 |
| Il1r1                                                                          | 16177                                                     | interleukin 1 receptor, type I                                       | 1448950_at   | up        | 2,7309873 |
| Hgf                                                                            | 15234                                                     | hepatocyte growth factor                                             | 1451866_a_at | up        | 2,7259493 |
|                                                                                |                                                           |                                                                      | 1447411_at   | up        | 2,7231643 |
| 4921524M04Rik                                                                  | 70890                                                     | RIKEN cDNA 4921524M04 gene                                           | 1433098_at   | up        | 2,7222111 |
| D14Ert449e /// ENSMUSC 100039192 /// DNA segment, Chr 14, ERATO Doi 449, expre |                                                           |                                                                      | 1428738_a_at | up        | 2,7213345 |
| Aspn                                                                           | 66695                                                     | asporin                                                              | 1416652_at   | up        | 2,7206342 |
| Ntrk2                                                                          | 18212                                                     | neurotrophic tyrosine kinase, receptor, type 2                       | 1420837_at   | up        | 2,715012  |
| Fosb                                                                           | 14282                                                     | FBJ osteosarcoma oncogene B                                          | 1422134_at   | up        | 2,7103639 |
|                                                                                |                                                           |                                                                      | 1441846_x_at | up        | 2,7058907 |
| Adamts12                                                                       | 239337                                                    | a disintegrin-like and metalloproteinase (repro                      | 1439827_at   | up        | 2,7052522 |
| 2810433D01Rik                                                                  | 77132                                                     | RIKEN cDNA 2810433D01 gene                                           | 1445896_at   | up        | 2,7051356 |
| Aass                                                                           | 30956                                                     | aminoadipate-semialdehyde synthase                                   | 1423523_at   | up        | 2,7039466 |
| Gfra2                                                                          | 14586                                                     | glial cell line derived neurotrophic factor famil                    | 1423007_a_at | up        | 2,7025955 |
| 2310001H17Rik                                                                  | 76432                                                     | RIKEN cDNA 2310001H17 gene                                           | 1446096_at   | up        | 2,7025304 |
| Meox1                                                                          | 17285                                                     | mesenchyme homeobox 1                                                | 1417595_at   | up        | 2,701504  |
| Casp1                                                                          | 12362                                                     | caspase 1                                                            | 1449265_at   | up        | 2,6995926 |
| Xaf1                                                                           | 327959                                                    | XIAP associated factor 1                                             | 1443698_at   | up        | 2,6960752 |
| Man1a                                                                          | 17155                                                     | mannosidase 1, alpha                                                 | 1417111_at   | up        | 2,6942232 |
| Cgref1                                                                         | 68567                                                     | cell growth regulator with EF hand domain 1                          | 1424528_at   | up        | 2,6838915 |
|                                                                                |                                                           |                                                                      | 1442019_at   | up        | 2,6822023 |
| 1110012D08Rik                                                                  | 73827                                                     | RIKEN cDNA 1110012D08 gene                                           | 1433820_a_at | up        | 2,6810052 |
| Adamts12                                                                       | 239337                                                    | a disintegrin-like and metalloproteinase (repro                      | 1446666_at   | up        | 2,6771894 |
| Slc16a12                                                                       | 240638                                                    | solute carrier family 16 (monocarboxylic acid                        | 1434188_at   | up        | 2,6766472 |



|                                                                                       |                                                        |              |    |           |
|---------------------------------------------------------------------------------------|--------------------------------------------------------|--------------|----|-----------|
| Casp4                                                                                 | 12363 caspase 4, apoptosis-related cysteine peptida    | 1449591_at   | up | 2,6738894 |
| Gm266                                                                                 | 212539 gene model 266, (NCBI)                          | 1436115_at   | up | 2,6714623 |
| Sphkap                                                                                | 77629 SPHK1 interactor, AKAP domain containing         | 1454926_at   | up | 2,6648602 |
| Ramp2                                                                                 | 54409 receptor (calcitonin) activity modifying protein | 1418187_at   | up | 2,6646466 |
| Nfib                                                                                  | 18028 nuclear factor I/B                               | 1416293_at   | up | 2,66021   |
| ORF63                                                                                 | 224419 open reading frame 63                           | 1451810_at   | up | 2,6592054 |
| Fam82a1                                                                               | 381110 family with sequence similarity 82, member A    | 1438036_x_at | up | 2,6445165 |
| LOC100045567 /// Pnp1 // 100045567 /// similar to purine nucleoside phosphorylase /// |                                                        | 1453299_a_at | up | 2,6417017 |
|                                                                                       |                                                        | 1441247_at   | up | 2,6404731 |
| 5033415L01Rik                                                                         | 75982 RIKEN cDNA 5033415L01 gene                       | 1453905_at   | up | 2,6381958 |
| Nfib                                                                                  | 18028 nuclear factor I/B                               | 1434101_at   | up | 2,638135  |
| Ddc                                                                                   | 13195 dopa decarboxylase                               | 1426215_at   | up | 2,6366358 |
| Ifi203                                                                                | 15950 interferon activated gene 203                    | 1448775_at   | up | 2,6357753 |
| Hspa1b                                                                                | 15511 heat shock protein 1B                            | 1427126_at   | up | 2,6352746 |
| Cxcl2                                                                                 | 20310 chemokine (C-X-C motif) ligand 2                 | 1449984_at   | up | 2,633199  |
| AW551984                                                                              | 244810 expressed sequence AW551984                     | 1433435_at   | up | 2,6178856 |
| Rnf144a                                                                               | 108089 ring finger protein 144A                        | 1421242_at   | up | 2,6158516 |
| A130040M12Rik                                                                         | 319269 RIKEN cDNA A130040M12 gene                      | 1428909_at   | up | 2,6152039 |
| Lox                                                                                   | 16948 lysyl oxidase                                    | 1448228_at   | up | 2,6125977 |
| Lbp                                                                                   | 16803 lipopolysaccharide binding protein               | 1448550_at   | up | 2,612395  |
| Pcsk5                                                                                 | 18552 proprotein convertase subtilisin/kexin type 5    | 1451406_a_at | up | 2,607854  |
| 6030403N03Rik                                                                         | 402764 RIKEN cDNA 6030403N03 gene                      | 1446341_at   | up | 2,6061478 |
| Sec16b                                                                                | 89867 SEC16 homolog B (S. cerevisiae)                  | 1450734_at   | up | 2,6045964 |
| Ptx3                                                                                  | 19288 pentraxin related gene                           | 1418666_at   | up | 2,6028616 |
| Abca1                                                                                 | 11303 ATP-binding cassette, sub-family A (ABC1), m     | 1421840_at   | up | 2,5974047 |
| Egfr                                                                                  | 13649 epidermal growth factor receptor                 | 1424932_at   | up | 2,595796  |
| Gas7                                                                                  | 14457 Growth arrest-specific 7-cb protein (Gas7-cb)    | 1457948_at   | up | 2,592006  |
| Xdh                                                                                   | 22436 xanthine dehydrogenase                           | 1451006_at   | up | 2,5889578 |
| Zim1                                                                                  | 22776 zinc finger, imprinted 1                         | 1421405_at   | up | 2,587855  |
| Slc1a5                                                                                | 20514 solute carrier family 1 (neutral amino acid tra  | 1416629_at   | up | 2,58777   |
|                                                                                       |                                                        | 1438084_at   | up | 2,586697  |
| Htra3                                                                                 | 78558 HtrA serine peptidase 3                          | 1419292_at   | up | 2,584431  |
| 1110012D08Rik                                                                         | 73827 RIKEN cDNA 1110012D08 gene                       | 1433821_at   | up | 2,5805821 |
| Gas7                                                                                  | 14457 growth arrest specific 7                         | 1445685_at   | up | 2,5796995 |
| Prkar2b                                                                               | 19088 protein kinase, cAMP dependent regulatory, t     | 1438664_at   | up | 2,5776832 |
| Atf3                                                                                  | 11910 activating transcription factor 3                | 1449363_at   | up | 2,5703475 |
| Ppp1r3c                                                                               | 53412 protein phosphatase 1, regulatory (inhibitor) :  | 1433691_at   | up | 2,5690846 |
| AI987986                                                                              | 105573 expressed sequence AI987986                     | 1457717_at   | up | 2,5634387 |
| Gpr81                                                                                 | 243270 G protein-coupled receptor 81                   | 1438411_at   | up | 2,560625  |
| Pcolce                                                                                | 18542 procollagen C-endopeptidase enhancer protei      | 1437165_a_at | up | 2,5584404 |
| Ptn                                                                                   | 19242 pleiotrophin                                     | 1416211_a_at | up | 2,5584304 |
| Abi3bp                                                                                | 320712 ABI gene family, member 3 (NESH) binding p      | 1427054_s_at | up | 2,557425  |
| Hspa1b                                                                                | 15511 heat shock protein 1B                            | 1427127_x_at | up | 2,5573165 |
| Nenf                                                                                  | 66208 neuron derived neurotrophic factor               | 1417879_at   | up | 2,5572443 |
| Pcdh19                                                                                | 279653 protocadherin 19                                | 1455145_at   | up | 2,554321  |
| Khk                                                                                   | 16548 ketohexokinase                                   | 1449062_at   | up | 2,5535727 |
| Prdm8                                                                                 | 77630 PR domain containing 8                           | 1455925_at   | up | 2,5483823 |
| Adm                                                                                   | 11535 adrenomedullin                                   | 1416077_at   | up | 2,5473373 |
| Fkbp11                                                                                | 66120 FK506 binding protein 11                         | 1417267_s_at | up | 2,5445087 |
| 6330406115Rik                                                                         | 70717 RIKEN cDNA 6330406115 gene                       | 1452244_at   | up | 2,5415778 |
| Kazald1                                                                               | 107250 Kazal-type serine peptidase inhibitor domain    | 1436528_at   | up | 2,538832  |
| Nfib                                                                                  | 18028 nuclear factor I/B                               | 1454834_at   | up | 2,535415  |
|                                                                                       |                                                        | 1458205_at   | up | 2,5343528 |
| Irgm2                                                                                 | 54396 immunity-related GTPase family M member 2        | 1417793_at   | up | 2,523436  |
| Cmpk2                                                                                 | 22169 cytidine monophosphate (UMP-CMP) kinase 2        | 1450484_a_at | up | 2,523231  |
| Tmem135                                                                               | 72759 transmembrane protein 135                        | 1452074_at   | up | 2,522978  |
| Hcfc1r1                                                                               | 353502 host cell factor C1 regulator 1 (XPO1-depende   | 1428406_s_at | up | 2,5210845 |
| Pear1                                                                                 | 73182 platelet endothelial aggregation receptor 1      | 1425267_a_at | up | 2,5201402 |
| Ntrk2                                                                                 | 18212 neurotrophic tyrosine kinase, receptor, type 2   | 1435196_at   | up | 2,5180175 |
| Mrpl19                                                                                | 56284 mitochondrial ribosomal protein L19              | 1421913_at   | up | 2,5175056 |
| Acyp2                                                                                 | 75572 acylphosphatase 2, muscle type                   | 1427943_at   | up | 2,5173123 |
| Tmed3                                                                                 | 66111 transmembrane emp24 domain containing 3          | 1416108_a_at | up | 2,5163722 |
| Ifitm3                                                                                | 66141 interferon induced transmembrane protein 3       | 1423754_at   | up | 2,5129678 |
| Sema3c                                                                                | 20348 sema domain, immunoglobulin domain (Ig), s       | 1429348_at   | up | 2,5066144 |
| Depdc6                                                                                | 97998 DEP domain containing 6                          | 1453571_at   | up | 2,506455  |
| Larp6                                                                                 | 67557 La ribonucleoprotein domain family, member       | 1418400_at   | up | 2,5057406 |
| Steap4                                                                                | 117167 STEAP family member 4                           | 1460197_a_at | up | 2,495369  |
|                                                                                       |                                                        | 1438072_at   | up | 2,495058  |
| Pcdh19                                                                                | 279653 protocadherin 19                                | 1437360_at   | up | 2,4943714 |
| Hmgcs2                                                                                | 15360 3-hydroxy-3-methylglutaryl-Coenzyme A syn        | 1431833_a_at | up | 2,49325   |
| Kcne4                                                                                 | 57814 potassium voltage-gated channel, Isk-related     | 1418156_at   | up | 2,4868786 |
| Kitl                                                                                  | 17311 kit ligand                                       | 1426152_a_at | up | 2,483331  |
| Prokr1                                                                                | 58182 prokineticin receptor 1                          | 1456543_at   | up | 2,4809694 |
| Klf2                                                                                  | 16598 Kruppel-like factor 2 (lung)                     | 1448890_at   | up | 2,4806216 |

|                        |               |                                                    |                                           |            |           |           |
|------------------------|---------------|----------------------------------------------------|-------------------------------------------|------------|-----------|-----------|
| Lepr                   | 16847         | leptin receptor                                    | 1425644_at                                | up         | 2,4782407 |           |
| Depdc6                 | 97998         | DEP domain containing 6                            | 1443579_s_at                              | up         | 2,4777882 |           |
| H2-M3                  | 14991         | histocompatibility 2, M region locus 3             | 1421358_at                                | up         | 2,477575  |           |
| LOC100045567 /// Pnp1  | 100045567 /// | similar to purine nucleoside phosphorylase ///     | 1416530_a_at                              | up         | 2,4748628 |           |
| Gsn                    | 227753        | gelsolin                                           | 1415812_at                                | up         | 2,4721017 |           |
| Clec14a                | 66864         | C-type lectin domain family 14, member a           | 1419468_at                                | up         | 2,4674513 |           |
| Lox                    | 16948         | lysyl oxidase                                      | 1416121_at                                | up         | 2,4662285 |           |
| Mtap9                  | 213582        | microtubule-associated protein 9                   | 1440231_at                                | up         | 2,4660661 |           |
|                        |               |                                                    | 1445148_at                                | up         | 2,463572  |           |
| Egfr                   | 13649         | epidermal growth factor receptor                   | 1435888_at                                | up         | 2,4617348 |           |
| Hivep2                 | 15273         | human immunodeficiency virus type I enhanc         | 1422018_at                                | up         | 2,460385  |           |
| Arhgap20               | 244867        | Rho GTPase activating protein 20                   | 1429918_at                                | up         | 2,4576564 |           |
| Rnf112                 | 22671         | ring finger protein 112                            | 1456108_x_at                              | up         | 2,4549558 |           |
| Aspn                   | 66695         | asporin                                            | 1448421_s_at                              | up         | 2,4539967 |           |
| Gaa                    | 14387         | glucosidase, alpha, acid                           | 1419428_a_at                              | up         | 2,4493828 |           |
| Nfib                   | 18028         | nuclear factor I/B                                 | 1438244_at                                | up         | 2,447772  |           |
| Tnfrsf22 /// Tnfrsf23  | 79201 ///     | tumor necrosis factor receptor superfamily, m      | 1442590_at                                | up         | 2,4469023 |           |
| Icosl                  | 50723         | icos ligand                                        | 1419212_at                                | up         | 2,442437  |           |
| Engase                 | 217364        | endo-beta-N-acetylglucosaminidase                  | 1435289_at                                | up         | 2,4367757 |           |
| Pde1a                  | 18573         | phosphodiesterase 1A, calmodulin-dependent         | 1449298_a_at                              | up         | 2,4346316 |           |
| Smoc2                  | 64074         | SPARC related modular calcium binding 2            | 1415935_at                                | up         | 2,4336648 |           |
| Vcan                   | 13003         | versican                                           | 1447887_x_at                              | up         | 2,4330413 |           |
| Wfdc12                 | 192200        | WAP four-disulfide core domain 12                  | 1449191_at                                | up         | 2,4313686 |           |
| Depdc6                 | 97998         | DEP domain containing 6                            | 1428622_at                                | up         | 2,430418  |           |
| Lama4                  | 16775         | laminin, alpha 4                                   | 1424807_at                                | up         | 2,4292648 |           |
| Ptger3                 | 19218         | prostaglandin E receptor 3 (subtype EP3)           | 1425251_at                                | up         | 2,427172  |           |
| St6galnac5             | 26938         | ST6 (alpha-N-acetyl-neuraminy-2,3-beta-gal.        | 1449468_at                                | up         | 2,425418  |           |
| Bckdhb                 | 12040         | branched chain ketoacid dehydrogenase E1, t        | 1427153_at                                | up         | 2,4231129 |           |
| Nespas                 | 56802         | neuroendocrine secretory protein antisense         | 1427788_at                                | up         | 2,4212496 |           |
| Ernm                   | 77767         | ermin, ERM-like protein                            | 1440902_at                                | up         | 2,420563  |           |
| Fgfr1 /// LOC100046239 | 100046239 /// | fibroblast growth factor receptor-like 1 ///       | 1447878_s_at                              | up         | 2,418922  |           |
| Slco2a1                | 24059         | solute carrier organic anion transporter family    | 1450032_at                                | up         | 2,4187517 |           |
| Slc1a3                 | 20512         | solute carrier family 1 (glial high affinity gluta | 1440491_at                                | up         | 2,417278  |           |
| Entpd5                 | 12499         | ectonucleoside triphosphate diphosphohydroly       | 1417382_at                                | up         | 2,4159446 |           |
| Klf9                   | 16601         | Kruppel-like factor 9                              | 1422264_s_at                              | up         | 2,4145164 |           |
| Sema3c                 | 20348         | sema domain, immunoglobulin domain (Ig), s         | 1420696_at                                | up         | 2,4114962 |           |
| Sv2b                   | 64176         | synaptic vesicle glycoprotein 2 b                  | 1434800_at                                | up         | 2,4103732 |           |
| Hmgcs2                 | 15360         | 3-hydroxy-3-methylglutaryl-Coenzyme A syn          | 1423858_a_at                              | up         | 2,4095645 |           |
| Abcd2                  | 26874         | ATP-binding cassette, sub-family D (ALD), me       | 1419748_at                                | up         | 2,4082794 |           |
| Tgfb2                  | 21808         | transforming growth factor, beta 2                 | 1450922_a_at                              | up         | 2,4024951 |           |
| Slc4a4                 | 54403         | solute carrier family 4 (anion exchanger), me      | 1421225_a_at                              | up         | 2,401222  |           |
| Tmem106a               | 217203        | transmembrane protein 106A                         | 1425025_at                                | up         | 2,396434  |           |
| Timp1                  | 21857         | tissue inhibitor of metalloproteinase 1            | 1460227_at                                | up         | 2,3943732 |           |
| Ghr                    | 14600         | growth hormone receptor                            | 1451871_a_at                              | up         | 2,3937414 |           |
|                        |               |                                                    | 1442214_at                                | up         | 2,388129  |           |
| Sectm1a                | 209588        | secreted and transmembrane 1A                      | 1425002_at                                | up         | 2,3868513 |           |
|                        | Mär.03        |                                                    |                                           |            |           |           |
|                        |               | 320253                                             | membrane-associated ring finger (C3HC4) 3 | 1441643_at | up        | 2,3785892 |
| Il15ra                 | 16169         | interleukin 15 receptor, alpha chain               | 1448681_at                                | up         | 2,3737195 |           |
| Abca8a                 | 217258        | ATP-binding cassette, sub-family A (ABC1), m       | 1427371_at                                | up         | 2,3731577 |           |
|                        |               |                                                    | 1456648_at                                | up         | 2,3718758 |           |
| Amacr                  | 17117         | alpha-methylacyl-CoA racemase                      | 1417208_at                                | up         | 2,3714266 |           |
| Ifit3                  | 15959         | interferon-induced protein with tetratricopepti    | 1449025_at                                | up         | 2,3704524 |           |
| LOC666466 /// Obox2    | 246792 ///    | 66 similar to OBOX2 /// oocyte specific homeo      | 1456017_x_at                              | up         | 2,3685236 |           |
| Naalad2                | 72560         | N-acetylated alpha-linked acidic dipeptidase 2     | 1422671_s_at                              | up         | 2,3666    |           |
| Oxsm                   | 71147         | 3-oxoacyl-ACP synthase, mitochondrial              | 1455395_at                                | up         | 2,3646996 |           |
| Vapb                   | 56491         | vesicle-associated membrane protein, associa       | 1423152_at                                | up         | 2,3646252 |           |
| Ang                    | 11727         | angiogenin, ribonuclease, RNase A family, 5        | 1438936_s_at                              | up         | 2,3616178 |           |
| Slco2b1                | 101488        | solute carrier organic anion transporter family    | 1454777_at                                | up         | 2,3587134 |           |
| Mest                   | 17294         | mesoderm specific transcript                       | 1423294_at                                | up         | 2,352381  |           |
| Arhgap20               | 244867        | Rho GTPase activating protein 20                   | 1427522_at                                | up         | 2,3484936 |           |
| Rassf2                 | 215653        | Ras association (RalGDS/AF-6) domain family        | 1444889_at                                | up         | 2,345322  |           |
| Abli1                  | 226251        | actin-binding LIM protein 1                        | 1454708_at                                | up         | 2,3441641 |           |
| Adam12                 | 11489         | a disintegrin and metalloproteinase domain 12      | 1421171_at                                | up         | 2,342694  |           |
| Erap1                  | 80898         | endoplasmic reticulum aminopeptidase 1             | 1416942_at                                | up         | 2,3392491 |           |
| Shisa3                 | 330096        | shisa homolog 3 (Xenopus laevis)                   | 1438884_at                                | up         | 2,3359833 |           |
| D530031A16Rik          | 78724         | RIKEN cDNA D530031A16 gene                         | 1433311_at                                | up         | 2,3358765 |           |
| Aebp1                  | 11568         | AE binding protein 1                               | 1422514_at                                | up         | 2,3355575 |           |
| Dnajc6                 | 72685         | DnaJ (Hsp40) homolog, subfamily C, member          | 1431216_s_at                              | up         | 2,3326147 |           |
| Igfbp6                 | 16012         | insulin-like growth factor binding protein 6       | 1417933_at                                | up         | 2,328691  |           |
| 1810010H24Rik          | 69066         | RIKEN cDNA 1810010H24 gene                         | 1428809_at                                | up         | 2,3272815 |           |
| Rasgrf1                | 19417         | RAS protein-specific guanine nucleotide-relea      | 1435614_s_at                              | up         | 2,3248394 |           |
| Cgref1                 | 68567         | cell growth regulator with EF hand domain 1        | 1424529_s_at                              | up         | 2,3234272 |           |
| Svep1                  | 64817         | sushi, von Willebrand factor type A, EGF and       | 1419182_at                                | up         | 2,3234165 |           |
| Met                    | 17295         | met proto-oncogene                                 | 1434447_at                                | up         | 2,3198059 |           |

|                                         |                                              |                                                    |              |           |           |
|-----------------------------------------|----------------------------------------------|----------------------------------------------------|--------------|-----------|-----------|
| Kctd12b                                 | 207474                                       | potassium channel tetramerisation domain co        | 1442368_at   | up        | 2,3177152 |
| Tmem178                                 | 68027                                        | transmembrane protein 178                          | 1429175_at   | up        | 2,317604  |
| Smarca1                                 | 93761                                        | SWI/SNF related, matrix associated, actin de       | 1460292_a_at | up        | 2,316353  |
| Kctd12                                  | 239217                                       | potassium channel tetramerisation domain co        | 1434881_s_at | up        | 2,3161242 |
| Pcsk6                                   | 18553                                        | proprotein convertase subtilisin/kexin type 6      | 1426981_at   | up        | 2,3152976 |
| Fxc1                                    | 14356                                        | fractured callus expressed transcript 1            | 1417916_a_at | up        | 2,3136692 |
| Col12a1                                 | 12816                                        | collagen, type XII, alpha 1                        | 1427391_a_at | up        | 2,3136683 |
| Hsd17b11                                | 114664                                       | hydroxysteroid (17-beta) dehydrogenase 11          | 1434642_at   | up        | 2,3109844 |
| Arhgap21                                | 71435                                        | Rho GTPase activating protein 21                   | 1428368_at   | up        | 2,3105352 |
| Fbn1                                    | 14118                                        | fibrillin 1                                        | 1438870_at   | up        | 2,3102384 |
| Fitm2                                   | 228859                                       | fat storage-inducing transmembrane protein         | 1454935_at   | up        | 2,3070526 |
| Zfx3                                    | 11906                                        | zinc finger homeobox 3                             | 1453267_at   | up        | 2,3065996 |
| Gfra2                                   | 14586                                        | glial cell line derived neurotrophic factor famil  | 1425578_a_at | up        | 2,30473   |
| Csgalnact1                              | 234356                                       | chondroitin sulfate N-acetylgalactosaminyltr       | 1452365_at   | up        | 2,303972  |
| Cdh26                                   | 381409                                       | cadherin-like 26                                   | 1456937_at   | up        | 2,301304  |
| Ar                                      | 11835                                        | androgen receptor                                  | 1455647_at   | up        | 2,295866  |
| Col14a1                                 | 12818                                        | collagen, type XIV, alpha 1                        | 1427168_a_at | up        | 2,2934582 |
| Clec14a                                 | 66864                                        | C-type lectin domain family 14, member a           | 1419467_at   | up        | 2,2926245 |
| Mmp23                                   | 26561                                        | matrix metalloproteinase 23                        | 1417281_a_at | up        | 2,29155   |
| Neur1a                                  | 18011                                        | neuralized homolog 1A (Drosophila)                 | 1456854_at   | up        | 2,2902424 |
|                                         |                                              |                                                    | 1446738_at   | up        | 2,289112  |
| Ttc39b                                  | 69863                                        | tetratricopeptide repeat domain 39B                | 1440192_at   | up        | 2,2870643 |
| Susd2                                   | 71733                                        | sushi domain containing 2                          | 1426511_at   | up        | 2,2856598 |
| Sigmar1                                 | 18391                                        | sigma non-opioid intracellular receptor 1          | 1416750_at   | up        | 2,2855716 |
| Enpp2                                   | 18606                                        | ectonucleotide pyrophosphatase/phosphodies         | 1448136_at   | up        | 2,2843342 |
| Pltp                                    | 18830                                        | phospholipid transfer protein                      | 1417963_at   | up        | 2,2837255 |
| Pdgfrl                                  | 68797                                        | platelet-derived growth factor receptor-like       | 1428896_at   | up        | 2,282032  |
| Sv2b                                    | 64176                                        | synaptic vesicle glycoprotein 2 b                  | 1435687_at   | up        | 2,2780545 |
| Ang                                     | 11727                                        | angiogenin, ribonuclease, RNase A family, 5        | 1450717_at   | up        | 2,277357  |
|                                         |                                              |                                                    | 1438245_at   | up        | 2,2770379 |
| Srxp2                                   | 68792                                        | sushi-repeat-containing protein, X-linked 2        | 1427919_at   | up        | 2,2757225 |
| Lmbr1                                   | 56873                                        | limb region 1                                      | 1442371_at   | up        | 2,2755938 |
| Rtn4rl1                                 | 237847                                       | reticulon 4 receptor-like 1                        | 1455664_at   | up        | 2,274735  |
| Abhd5                                   | 67469                                        | abhydrolase domain containing 5                    | 1417565_at   | up        | 2,2726643 |
| Ttc39b                                  | 69863                                        | tetratricopeptide repeat domain 39B                | 1452008_at   | up        | 2,2676642 |
| Ugt1a1 /// Ugt1a10 /// Ug 22236 /// 394 | UDP glucuronosyltransferase 1 family, polype | 1424783_a_at                                       | up           | 2,267597  |           |
|                                         |                                              | 1442026_at                                         | up           | 2,2661285 |           |
| Glt8d2                                  | 74782                                        | glycosyltransferase 8 domain containing 2          | 1429402_at   | up        | 2,2637641 |
| Angptl1                                 | 72713                                        | angiopoietin-like 1                                | 1421421_at   | up        | 2,2597983 |
| Rtn2                                    | 20167                                        | reticulon 2 (Z-band associated protein)            | 1419056_at   | up        | 2,258783  |
| Nfib                                    | 18028                                        | nuclear factor I/B                                 | 1434102_at   | up        | 2,2586157 |
| Vkorc1                                  | 27973                                        | vitamin K epoxide reductase complex, subuni        | 1452770_at   | up        | 2,2579803 |
| Kihl29                                  | 208439                                       | kelch-like 29 (Drosophila)                         | 1434639_at   | up        | 2,255471  |
|                                         |                                              |                                                    | 1440006_at   | up        | 2,25377   |
| Irak3                                   | 73914                                        | interleukin-1 receptor-associated kinase 3         | 1430704_at   | up        | 2,2530284 |
| P4ha3                                   | 320452                                       | procollagen-proline, 2-oxoglutarate 4-dioxyge      | 1446951_at   | up        | 2,252355  |
| Cry2                                    | 12953                                        | cryptochrome 2 (photolyase-like)                   | 1426383_at   | up        | 2,252129  |
| S100a16                                 | 67860                                        | S100 calcium binding protein A16                   | 1447676_x_at | up        | 2,2516794 |
| Bicc1                                   | 83675                                        | bicaudal C homolog 1 (Drosophila)                  | 1441137_at   | up        | 2,2511828 |
| Zfp462                                  | 242466                                       | zinc finger protein 462                            | 1456789_at   | up        | 2,2510042 |
| Elmo2                                   | 140579                                       | engulfment and cell motility 2, ced-12 homol       | 1436011_at   | up        | 2,2472053 |
| Ppp1r3c                                 | 53412                                        | protein phosphatase 1, regulatory (inhibitor)      | 1425631_at   | up        | 2,2471309 |
| Ghr                                     | 14600                                        | growth hormone receptor                            | 1417962_s_at | up        | 2,2457824 |
|                                         |                                              |                                                    | 1436697_at   | up        | 2,24009   |
| Gucy1a3                                 | 60596                                        | guanylate cyclase 1, soluble, alpha 3              | 1420533_at   | up        | 2,2400296 |
| Il1rl2                                  | 107527                                       | interleukin 1 receptor-like 2                      | 1434903_s_at | up        | 2,2392106 |
| Gbp3                                    | 55932                                        | guanylate binding protein 3                        | 1418392_a_at | up        | 2,2366235 |
| Adamts14                                | 229595                                       | ADAMTS-like 4                                      | 1451932_a_at | up        | 2,2321792 |
| Scara3                                  | 219151                                       | scavenger receptor class A, member 3               | 1427020_at   | up        | 2,2304997 |
| Clec11a                                 | 20256                                        | C-type lectin domain family 11, member a           | 1418796_at   | up        | 2,2285898 |
| Lpar4                                   | 78134                                        | lysophosphatidic acid receptor 4                   | 1439665_at   | up        | 2,2279236 |
| Tmem173                                 | 72512                                        | transmembrane protein 173                          | 1447621_s_at | up        | 2,2265863 |
| Slc1a3                                  | 20512                                        | solute carrier family 1 (glial high affinity gluta | 1426341_at   | up        | 2,2248466 |
| Smoc2                                   | 64074                                        | SPARC related modular calcium binding 2            | 1431362_a_at | up        | 2,2229526 |
| Scg3                                    | 20255                                        | secretogranin III                                  | 1448628_at   | up        | 2,2221677 |
| Rsad2                                   | 58185                                        | radical S-adenosyl methionine domain contair       | 1436058_at   | up        | 2,2198434 |
| Nfkbiz                                  | 80859                                        | nuclear factor of kappa light polypeptide gene     | 1417483_at   | up        | 2,2175415 |
| Arhgap29                                | 214137                                       | Rho GTPase activating protein 29                   | 1444512_at   | up        | 2,2144082 |
| Lox1l                                   | 16949                                        | lysyl oxidase-like 1                               | 1451978_at   | up        | 2,2138236 |
| LOC100047606 /// Ntrk3                  | 100047606 ///                                | similar to neurotrophic tyrosine kinase, recep     | 1422329_a_at | up        | 2,2131598 |
| 2310039H08Rik                           | 67101                                        | RIKEN cDNA 2310039H08 gene                         | 1417348_at   | up        | 2,2128596 |
| Gsto1                                   | 14873                                        | glutathione S-transferase omega 1                  | 1456036_x_at | up        | 2,2125075 |
| Csf1                                    | 12977                                        | colony stimulating factor 1 (macrophage)           | 1425155_x_at | up        | 2,2118797 |
| Csgalnact1                              | 234356                                       | chondroitin sulfate N-acetylgalactosaminyltr       | 1452366_at   | up        | 2,2118487 |

|                                     |           |                                                                            |              |    |           |
|-------------------------------------|-----------|----------------------------------------------------------------------------|--------------|----|-----------|
| Abhd14b                             | 76491     | abhydrolase domain containing 14b                                          | 1451326_at   | up | 2,2088397 |
| Btg2                                | 12227     | B-cell translocation gene 2, anti-proliferative                            | 1448272_at   | up | 2,2054703 |
| Fabp4                               | 11770     | fatty acid binding protein 4, adipocyte                                    | 1424155_at   | up | 2,2023513 |
| Ar                                  | 11835     | androgen receptor                                                          | 1437064_at   | up | 2,2022667 |
| Map3k5                              | 26408     | mitogen-activated protein kinase kinase kinase                             | 1439830_at   | up | 2,1993523 |
| Pla2r1                              | 18779     | phospholipase A2 receptor 1                                                | 1450144_at   | up | 2,1946063 |
|                                     |           |                                                                            | 1423435_at   | up | 2,192574  |
| Thbs2                               | 21826     | thrombospondin 2                                                           | 1447862_x_at | up | 2,1918106 |
| Tmem107                             | 66910     | transmembrane protein 107                                                  | 1429058_at   | up | 2,1916566 |
| Fibin                               | 67606     | fin bud initiation factor homolog (zebrafish)                              | 1419376_at   | up | 2,190497  |
| Igtp                                | 16145     | interferon gamma induced GTPase                                            | 1417141_at   | up | 2,18968   |
| Tcf7l2                              | 21416     | transcription factor 7-like 2, T-cell specific, HNF1B                      | 1426639_a_at | up | 2,185422  |
| Col14a1                             | 12818     | collagen, type XIV, alpha 1                                                | 1453931_at   | up | 2,1853142 |
| Nucb2                               | 53322     | nucleobindin 2                                                             | 1418355_at   | up | 2,1804714 |
| Tmem97                              | 69071     | transmembrane protein 97                                                   | 1416376_at   | up | 2,179775  |
| Smtnl2                              | 276829    | smoothelin-like 2                                                          | 1455794_at   | up | 2,1762314 |
| Itgb5                               | 16419     | integrin beta 5                                                            | 1456195_x_at | up | 2,175745  |
| D9Ertd720e                          | 52145     | DNA segment, Chr 9, ERATO Doi 720, expressed                               | 1457776_at   | up | 2,1746588 |
| Angptl2                             | 26360     | angiopoietin-like 2                                                        | 1421002_at   | up | 2,1743908 |
| Arsa                                | 11883     | arylsulfatase A                                                            | 1460346_at   | up | 2,1712599 |
| C3                                  | 12266     | complement component 3                                                     | 1423954_at   | up | 2,1710334 |
| Derl1                               | 67819     | Der1-like domain family, member 1                                          | 1423082_at   | up | 2,1692085 |
| Pla2g16                             | 225845    | phospholipase A2, group XVI                                                | 1451611_at   | up | 2,167748  |
| Akap7                               | 432442    | A kinase (PRKA) anchor protein 7                                           | 1433905_at   | up | 2,166673  |
| Fmo5 /// LOC100046051               | 100046051 | flavin containing monooxygenase 5 /// similar                              | 1450332_s_at | up | 2,166416  |
| Ptges                               | 64292     | prostaglandin E synthase                                                   | 1439747_at   | up | 2,1663249 |
| Hspa1b                              | 15511     | heat shock protein 1B                                                      | 1452318_a_at | up | 2,164634  |
| Ugdh                                | 22235     | UDP-glucose dehydrogenase                                                  | 1416308_at   | up | 2,1644487 |
| Sdpr                                | 20324     | serum deprivation response                                                 | 1416778_at   | up | 2,1631281 |
| Tspan18                             | 241556    | tetraspanin 18                                                             | 1442174_at   | up | 2,162686  |
| Creg1                               | 433375    | cellular repressor of E1A-stimulated genes 1                               | 1415948_at   | up | 2,1624777 |
| Gfra2                               | 14586     | glial cell line derived neurotrophic factor family                         | 1459847_x_at | up | 2,159782  |
| Il1r2                               | 16178     | interleukin 1 receptor, type II                                            | 1419532_at   | up | 2,156554  |
| Pim3                                | 223775    | proviral integration site 3                                                | 1437100_x_at | up | 2,1548338 |
| Abi3bp                              | 320712    | ABI gene family, member 3 (NESH) binding protein                           | 1427053_at   | up | 2,1530879 |
| Pycr1                               | 209027    | pyrroline-5-carboxylate reductase 1                                        | 1424556_at   | up | 2,1524446 |
|                                     |           |                                                                            | 1443852_at   | up | 2,151211  |
| Slc5a5                              | 114479    | solute carrier family 5 (sodium iodide symporter)                          | 1436239_at   | up | 2,1496994 |
| Abca1                               | 11303     | ATP-binding cassette, sub-family A (ABC1), member 1                        | 1421839_at   | up | 2,1492865 |
| Car3                                | 12350     | carbonic anhydrase 3                                                       | 1430584_s_at | up | 2,1485937 |
| Gfra2                               | 14586     | glial cell line derived neurotrophic factor family                         | 1433716_x_at | up | 2,1485233 |
| C85319                              | 97983     | expressed sequence C85319                                                  | 1447267_at   | up | 2,1464357 |
| 1700025K23Rik                       | 66337     | RIKEN cDNA 1700025K23 gene                                                 | 1460553_at   | up | 2,1446497 |
| Ube2l6                              | 56791     | ubiquitin-conjugating enzyme E2L 6                                         | 1417172_at   | up | 2,1433878 |
| Cdc42ep2                            | 104252    | CDC42 effector protein (Rho GTPase binding)                                | 1428750_at   | up | 2,1429763 |
| Sepp1                               | 20363     | selenoprotein P, plasma, 1                                                 | 1452141_a_at | up | 2,1384187 |
| 100038993 /// Il11ra1 /// 100038993 | 100038993 | predicted gene, 100038993 /// interleukin 11                               | 1417505_s_at | up | 2,137587  |
| Apod                                | 11815     | apolipoprotein D                                                           | 1416371_at   | up | 2,1375008 |
| Foxo1                               | 56458     | forkhead box O1                                                            | 1416983_s_at | up | 2,1338353 |
| Retsat                              | 67442     | retinol saturase (all trans retinol 13,14 reductase)                       | 1424716_at   | up | 2,1336899 |
| Arhgap29                            | 214137    | Rho GTPase activating protein 29                                           | 1454745_at   | up | 2,1323628 |
| Acaa1a /// Acaa1b                   | 113868    | 23 acetyl-Coenzyme A acyltransferase 1A /// acyl-CoA oxidase 1             | 1416946_a_at | up | 2,130093  |
| Htra3                               | 78558     | HtrA serine peptidase 3                                                    | 1427029_at   | up | 2,1286478 |
| Flywch2                             | 76917     | FLYWCH family member 2                                                     | 1438982_s_at | up | 2,1285608 |
| Hp                                  | 15439     | haptoglobin                                                                | 1448881_at   | up | 2,1283066 |
| Dda1                                | 66498     | DET1 and DDB1 associated 1                                                 | 1429038_at   | up | 2,1272013 |
| Mfap4                               | 76293     | microfibrillar-associated protein 4                                        | 1424010_at   | up | 2,1241534 |
| Lysmd2                              | 70082     | LysM, putative peptidoglycan-binding, domain                               | 1428626_at   | up | 2,1234155 |
| Kera                                | 16545     | keratocan                                                                  | 1418063_at   | up | 2,1232023 |
| Aig1                                | 66253     | androgen-induced 1                                                         | 1420679_a_at | up | 2,1230292 |
| Il33                                | 77125     | interleukin 33                                                             | 1416200_at   | up | 2,1229758 |
| Sgms2                               | 74442     | sphingomyelin synthase 2                                                   | 1428663_at   | up | 2,1225216 |
| Rgl1                                | 19731     | ral guanine nucleotide dissociation stimulator, 1                          | 1449124_at   | up | 2,1224513 |
| St3gal1                             | 20442     | ST3 beta-galactoside alpha-2,3-sialyltransferase                           | 1418946_at   | up | 2,1197107 |
| Mapk8ip1                            | 19099     | mitogen-activated protein kinase 8 interacting protein                     | 1440619_at   | up | 2,1155026 |
| Hebp1                               | 15199     | heme binding protein 1                                                     | 1418172_at   | up | 2,115322  |
| Fcgrt                               | 14132     | Fc receptor, IgG, alpha chain transporter                                  | 1416978_at   | up | 2,114841  |
| Gas7                                | 14457     | growth arrest specific 7                                                   | 1431400_a_at | up | 2,1146493 |
| Gm715                               | 279618    | gene model 715, (NCBI)                                                     | 1445503_at   | up | 2,112715  |
| Lrrc61                              | 243371    | leucine rich repeat containing 61                                          | 1423843_at   | up | 2,105327  |
| Slc16a10                            | 72472     | solute carrier family 16 (monocarboxylic acid transporters)                | 1436368_at   | up | 2,1052356 |
| Gpx7                                | 67305     | glutathione peroxidase 7                                                   | 1417836_at   | up | 2,1033463 |
| Cited2                              | 17684     | Cbp/p300-interacting transactivator, with glutathione S-transferase domain | 1452207_at   | up | 2,1032317 |
| Gm22                                | 195209    | gene model 22, (NCBI)                                                      | 1459622_at   | up | 2,1018388 |

|                    |                                                              |              |    |           |
|--------------------|--------------------------------------------------------------|--------------|----|-----------|
| Ier3               | 15937 immediate early response 3                             | 1419647_a_at | up | 2,1011229 |
| S100a16            | 67860 S100 calcium binding protein A16                       | 1425560_a_at | up | 2,099613  |
| Cugbp2             | 14007 CUG triplet repeat, RNA binding protein 2              | 1439777_at   | up | 2,0979488 |
| Hspb8              | 80888 heat shock protein 8                                   | 1417013_at   | up | 2,0966372 |
| Tmem140            | 68487 transmembrane protein 140                              | 1424354_at   | up | 2,0955524 |
| EIi2               | 192657 elongation factor RNA polymerase II 2                 | 1450744_at   | up | 2,0927207 |
| Pcsk5              | 18552 proprotein convertase subtilisin/kexin type 5          | 1424605_at   | up | 2,0921168 |
| Mpa2l              | 100702 macrophage activation 2 like                          | 1447927_at   | up | 2,0914454 |
| Txnip              | 56338 thioredoxin interacting protein                        | 1415996_at   | up | 2,0898254 |
| Shisa3             | 330096 shisa homolog 3 ( <i>Xenopus laevis</i> )             | 1460000_at   | up | 2,089582  |
| Itgb5              | 16419 integrin beta 5                                        | 1417533_a_at | up | 2,0859463 |
| Echdc2             | 52430 enoyl Coenzyme A hydratase domain containi             | 1425788_a_at | up | 2,084781  |
| Gas7               | 14457 growth arrest specific 7                               | 1457270_at   | up | 2,0840957 |
| C1qtnf6            | 72709 C1q and tumor necrosis factor related protein          | 1431856_a_at | up | 2,0800202 |
| Lmbr1              | 56873 limb region 1                                          | 1426272_at   | up | 2,0793912 |
| Arsb               | 11881 arylsulfatase B                                        | 1429189_at   | up | 2,07674   |
| Il6st              | 16195 interleukin 6 signal transducer                        | 1452843_at   | up | 2,0761027 |
| Pcsk5              | 18552 proprotein convertase subtilisin/kexin type 5          | 1437339_s_at | up | 2,0738323 |
| Dapp1              | 26377 dual adaptor for phosphotyrosine and 3-phospho         | 1421936_at   | up | 2,072854  |
| Car5b              | 56078 carbonic anhydrase 5b, mitochondrial                   | 1419705_at   | up | 2,0697057 |
| Hint3              | 66847 histidine triad nucleotide binding protein 3           | 1418583_at   | up | 2,0647027 |
| Slc44a1            | 100434 solute carrier family 44, member 1                    | 1423865_at   | up | 2,063538  |
| 2210403K04Rik      | 67098 RIKEN cDNA 2210403K04 gene                             | 1428562_at   | up | 2,0625873 |
| Gk5                | 235533 glycerol kinase 5 (putative)                          | 1436210_at   | up | 2,061971  |
| Ctbs               | 74245 chitinase, di-N-acetyl-                                | 1452504_s_at | up | 2,061387  |
| St3gal2            | 20444 ST3 beta-galactoside alpha-2,3-sialyltransfera         | 1421892_at   | up | 2,0608666 |
| Rhoc               | 11853 ras homolog gene family, member C                      | 1448605_at   | up | 2,0594952 |
|                    |                                                              | 1445126_at   | up | 2,0579598 |
| Srxn1              | 76650 Sulfiredoxin 1 homolog ( <i>S. cerevisiae</i> ) (Srxn1 | 1419942_at   | up | 2,057346  |
| 5430435G22Rik      | 226421 RIKEN cDNA 5430435G22 gene                            | 1424987_at   | up | 2,0557687 |
| Col12a1            | 12816 collagen, type XII, alpha 1                            | 1434411_at   | up | 2,0553148 |
| BC028528           | 229600 cDNA sequence BC028528                                | 1427996_at   | up | 2,0548937 |
| Nedd9              | 18003 neural precursor cell expressed, development           | 1422818_at   | up | 2,0541954 |
| 4833438C02Rik      | 107243 RIKEN cDNA 4833438C02 gene                            | 1436524_at   | up | 2,052951  |
| Tnfrp2             | 21928 tumor necrosis factor, alpha-induced protein :         | 1438855_x_at | up | 2,0525901 |
| Atf5               | 107503 activating transcription factor 5                     | 1425927_a_at | up | 2,05241   |
| Id2                | 15902 inhibitor of DNA binding 2                             | 1422537_a_at | up | 2,0507348 |
| Casp12             | 12364 caspase 12                                             | 1449297_at   | up | 2,0478518 |
| Galnt12            | 230145 UDP-N-acetyl-alpha-D-galactosamine: polypep           | 1437760_at   | up | 2,0476525 |
| Tlr2               | 24088 toll-like receptor 2                                   | 1419132_at   | up | 2,0461113 |
| Ccdc80             | 67896 coiled-coil domain containing 80                       | 1424186_at   | up | 2,0449371 |
| EG331392           | 331392 predicted gene, EG331392                              | 1445504_at   | up | 2,043128  |
| Angptl2            | 26360 angiopoietin-like 2                                    | 1450085_at   | up | 2,0420258 |
| Penk               | 18619 preproenkephalin                                       | 1427038_at   | up | 2,0412729 |
| Scube2             | 56788 signal peptide, CUB domain, EGF-like 2                 | 1453486_a_at | up | 2,0403678 |
| Fam46a             | 212943 family with sequence similarity 46, member A          | 1437868_at   | up | 2,0401835 |
| Creg1              | 433375 cellular repressor of E1A-stimulated genes 1          | 1415947_at   | up | 2,039823  |
| ENSMUSG00000053512 | 56501 predicted gene, ENSMUSG00000053512                     | 1421337_at   | up | 2,0387561 |
| Acvr1l             | 11482 activin A receptor, type II-like 1                     | 1451604_a_at | up | 2,03822   |
| Magi3              | 99470 membrane associated guanylate kinase, WW               | 1421035_a_at | up | 2,0381196 |
| AW551984           | 244810 expressed sequence AW551984                           | 1433434_at   | up | 2,0364494 |
| D930003E18Rik      | 100048911 RIKEN cDNA D930003E18 gene                         | 1440007_at   | up | 2,0362399 |
| LepR               | 16847 leptin receptor                                        | 1425875_a_at | up | 2,0338757 |
| Crtap              | 56693 cartilage associated protein                           | 1448592_at   | up | 2,0334806 |
|                    |                                                              | 1456897_at   | up | 2,0326333 |
| Adamts9            | 101401 a disintegrin-like and metallopeptidase (repro        | 1437785_at   | up | 2,0325775 |
| Galnt1l            | 108760 UDP-N-acetyl-alpha-D-galactosamine: polypep           | 1416760_at   | up | 2,031714  |
| 2010309E21Rik      | 66488 RIKEN cDNA 2010309E21 gene, mRNA (cDNA                 | 1441796_at   | up | 2,0314357 |
| Rai14              | 75646 retinoic acid induced 14                               | 1417401_at   | up | 2,0304508 |
| Ptges              | 64292 prostaglandin E synthase                               | 1449450_at   | up | 2,0290911 |
| Add3               | 27360 adducin 3 (gamma)                                      | 1426574_a_at | up | 2,026838  |
| Endog              | 13804 endonuclease G                                         | 1438317_a_at | up | 2,026792  |
| Slfn5              | 327978 schlafen 5                                            | 1458458_at   | up | 2,0258422 |
| Nmi                | 64685 N-myc (and STAT) interactor                            | 1425719_a_at | up | 2,0258288 |
| Tmed5              | 73130 transmembrane emp24 protein transport dom              | 1424574_at   | up | 2,0254087 |
| Nnmt               | 18113 nicotinamide N-methyltransferase                       | 1432517_a_at | up | 2,0251353 |
| Il15ra             | 16169 interleukin 15 receptor, alpha chain                   | 1422397_a_at | up | 2,0249681 |
| Abhd4              | 105501 abhydrolase domain containing 4                       | 1439259_x_at | up | 2,0249343 |
| Klf5               | 12224 Kruppel-like factor 5                                  | 1451021_a_at | up | 2,0226882 |
| Scn7a              | 20272 sodium channel, voltage-gated, type VII, alph          | 1427495_at   | up | 2,0226653 |
| Clybl              | 69634 citrate lyase beta like                                | 1421014_a_at | up | 2,022483  |
| AI843755           | 100215 expressed sequence AI843755                           | 1457227_at   | up | 2,0217152 |
| Adm                | 11535 adrenomedullin                                         | 1447839_x_at | up | 2,0216103 |
| Sirpa              | 19261 signal-regulatory protein alpha                        | 1448534_at   | up | 2,020367  |

|               |        |                                                  |              |      |           |
|---------------|--------|--------------------------------------------------|--------------|------|-----------|
| Pcdh19        | 279653 | protocadherin 19                                 | 1444422_at   | up   | 2,018448  |
| Naa           | 67111  | N-acylethanolamine acid amidase                  | 1452067_at   | up   | 2,017922  |
| Npc2          | 67963  | Niemann Pick type C2                             | 1416901_at   | up   | 2,0177844 |
| Aldoa         | 11674  | aldolase A, fructose-bisphosphate                | 1433604_x_at | up   | 2,0168447 |
| Tnfrsf22      | 79202  | tumor necrosis factor receptor superfamily, m    | 1426095_a_at | up   | 2,0148747 |
| 1110014L15Rik | 66127  | RIKEN cDNA 1110014L15 gene                       | 1460487_at   | up   | 2,0133932 |
| Ar5b          | 11881  | arylsulfatase B                                  | 1429190_at   | up   | 2,0117178 |
| Klf9          | 16601  | Kruppel-like factor 9                            | 1428288_at   | up   | 2,0103245 |
| Grb10         | 14783  | growth factor receptor bound protein 10          | 1430164_a_at | up   | 2,0093162 |
| Aldoa         | 11674  | aldolase A, fructose-bisphosphate                | 1416921_x_at | up   | 2,0086687 |
| Psap          | 19156  | prosaposin                                       | 1415687_a_at | up   | 2,0083747 |
| AU015536      | 101232 | expressed sequence AU015536                      | 1445025_at   | up   | 2,007708  |
| Prkar2b       | 19088  | protein kinase, cAMP dependent regulatory, t     | 1456475_s_at | up   | 2,0057342 |
| Ctsk          | 13038  | cathepsin K                                      | 1450652_at   | up   | 2,0048711 |
| Mr1           | 15064  | major histocompatibility complex, class I-rela   | 1421898_a_at | up   | 2,00474   |
| Cd55          | 13136  | CD55 antigen                                     | 1443906_at   | up   | 2,0034251 |
| Lrrc17        | 74511  | leucine rich repeat containing 17                | 1429679_at   | up   | 2,0026963 |
| Enpp2         | 18606  | ectonucleotide pyrophosphatase/phosphodies       | 1415894_at   | up   | 2,0020313 |
| Lgals4        | 16855  | lectin, galactose binding, soluble 4             | 1451336_at   | up   | 2,0015485 |
| Retsat        | 67442  | retinol saturase (all trans retinol 13,14 reduct | 1424715_at   | up   | 2,0010774 |
| Inhba         | 16323  | inhibin beta-A                                   | 1422053_at   | down | 24,612768 |
| Clstn2        | 64085  | calsynenin 2                                     | 1441165_s_at | down | 21,766167 |
| Prdm1         | 12142  | PR domain containing 1, with ZNF domain          | 1420425_at   | down | 13,858948 |
| A930038C07Rik | 68169  | RIKEN cDNA A930038C07 gene                       | 1453225_at   | down | 13,642835 |
| Hes5          | 15208  | hairly and enhancer of split 5 (Drosophila)      | 1456010_x_at | down | 13,106865 |
| 1110064A23Rik | 68893  | RIKEN cDNA 1110064A23 gene                       | 1439543_at   | down | 12,067304 |
| Lrrn1         | 16979  | leucine rich repeat protein 1, neuronal          | 1416053_at   | down | 11,859629 |
| Ephb1         | 270190 | Eph receptor B1                                  | 1455188_at   | down | 11,110536 |
| Tcfap2c       | 21420  | transcription factor AP-2, gamma                 | 1418147_at   | down | 10,916606 |
| Dio2          | 13371  | deiodinase, iodothyronine, type II               | 1418937_at   | down | 10,782692 |
| Tcfap2c       | 21420  | transcription factor AP-2, gamma                 | 1448977_at   | down | 10,457016 |
| Prokr2        | 246313 | prokineticin receptor 2                          | 1437695_at   | down | 10,420709 |
| Prom1         | 19126  | prominin 1                                       | 1419700_a_at | down | 10,127229 |
| A930038C07Rik | 68169  | RIKEN cDNA A930038C07 gene                       | 1460465_at   | down | 9,490845  |
| Corin         | 53419  | corin                                            | 1419017_at   | down | 9,416158  |
| Prex2         | 109294 | phosphatidylinositol-3,4,5-trisphosphate-depe    | 1432047_at   | down | 9,008382  |
| Coch          | 12810  | coagulation factor C homolog (Limulus polyph     | 1423285_at   | down | 8,56802   |
|               |        |                                                  | 1443161_at   | down | 8,537113  |
| Tcfap2c       | 21420  | transcription factor AP-2, gamma                 | 1436392_s_at | down | 8,51615   |
| Cxcr4         | 12767  | chemokine (C-X-C motif) receptor 4               | 1448710_at   | down | 7,737871  |
| 5330433J24Rik | 78276  | RIKEN cDNA 5330433J24 gene                       | 1432935_at   | down | 7,622249  |
|               |        |                                                  | 1440026_at   | down | 7,565159  |
|               |        |                                                  | 1445869_at   | down | 7,561933  |
|               |        |                                                  | 1431225_at   | down | 7,4960485 |
| Foxd1         | 15229  | forkhead box D1                                  | 1418876_at   | down | 7,3359303 |
|               |        |                                                  | 1441333_at   | down | 7,2411904 |
| Dll1          | 13388  | delta-like 1 (Drosophila)                        | 1419204_at   | down | 7,2115498 |
| Apcdd1        | 494504 | Adenomatous polyposis coli down-regulated 1      | 1443639_at   | down | 7,0736623 |
| Frzb          | 20378  | frizzled-related protein                         | 1416658_at   | down | 7,049022  |
| Sox11         | 20666  | SRY-box containing gene 11                       | 1436790_a_at | down | 6,9978485 |
| Sox11         | 20666  | SRY-box containing gene 11                       | 1453125_at   | down | 6,9200845 |
| Rspo3         | 72780  | R-spondin 3 homolog (Xenopus laevis)             | 1455607_at   | down | 6,913683  |
| Prokr2        | 246313 | prokineticin receptor 2                          | 1440564_at   | down | 6,832094  |
| Adamts20      | 223838 | a disintegrin-like and metallopeptidase (repro   | 1456901_at   | down | 6,7124095 |
| Col23a1       | 237759 | collagen, type XXIII, alpha 1                    | 1429209_at   | down | 6,7111096 |
|               |        |                                                  | 1440052_at   | down | 6,5891137 |
|               |        |                                                  | 1456983_at   | down | 6,5865607 |
| Trps1         | 83925  | trichorhinophalangeal syndrome I (human)         | 1457445_at   | down | 6,579196  |
| C530008M17Rik | 320827 | RIKEN cDNA C530008M17 gene                       | 1434645_at   | down | 6,533178  |
| 5330433J24Rik | 78276  | RIKEN cDNA 5330433J24 gene                       | 1432936_at   | down | 6,500406  |
| Dab1          | 13131  | disabled homolog 1 (Drosophila)                  | 1435577_at   | down | 6,454861  |
|               |        |                                                  | 1458328_x_at | down | 6,4470425 |
| Fbp1          | 14121  | fructose bisphosphatase 1                        | 1448470_at   | down | 6,2359433 |
| Hey1          | 15213  | hairly/enhancer-of-split related with YRPW mo    | 1415999_at   | down | 6,225097  |
| Ednrb         | 13618  | endothelin receptor type B                       | 1437347_at   | down | 6,192658  |
| Fgfr4         | 14186  | fibroblast growth factor receptor 4              | 1418596_at   | down | 6,1750507 |
| Slc1a1        | 20510  | solute carrier family 1 (neuronal/epithelial hig | 1425415_a_at | down | 6,0274806 |
| Col23a1       | 237759 | collagen, type XXIII, alpha 1                    | 1440911_at   | down | 6,0058417 |
|               |        |                                                  | 1436279_at   | down | 5,9901533 |
| Lamc3         | 23928  | laminin gamma 3                                  | 1451758_at   | down | 5,9655075 |
| Spock1        | 20745  | sparc/osteonectin, cwcv and kazal-like domai     | 1419673_at   | down | 5,9604    |
| Dab1          | 13131  | disabled homolog 1 (Drosophila)                  | 1435578_s_at | down | 5,948686  |
| Slain1        | 105439 | SLAIN motif family, member 1                     | 1424824_at   | down | 5,8723917 |
| Kcnj3         | 16519  | potassium inwardly-rectifying channel, subfar    | 1455374_at   | down | 5,8590946 |

|                    |                                                        |              |      |           |
|--------------------|--------------------------------------------------------|--------------|------|-----------|
| Frzb               | 20378 frizzled-related protein                         | 1448424_at   | down | 5,7555947 |
| Lmo7               | 380928 LIM domain only 7                               | 1455056_at   | down | 5,596173  |
| Entpd1             | 12495 ectonucleoside triphosphate diphosphohydroly     | 1450939_at   | down | 5,5743723 |
| 3222402N08Rik      | 74021 RIKEN cDNA 3222402N08 gene                       | 1432656_at   | down | 5,5332184 |
| Sgip1              | 73094 SH3-domain GRB2-like (endophilin) interactin     | 1425180_at   | down | 5,5281777 |
| Bex1               | 19716 brain expressed gene 1                           | 1448595_a_at | down | 5,5275464 |
| Itga4              | 16401 integrin alpha 4                                 | 1450155_at   | down | 5,5256295 |
| Sgip1              | 73094 SH3-domain GRB2-like (endophilin) interactin     | 1431300_at   | down | 5,461338  |
| Sox11              | 20666 SRY-box containing gene 11                       | 1453002_at   | down | 5,397319  |
|                    |                                                        | 1440563_at   | down | 5,3810515 |
| 4930426D05Rik      | 74644 RIKEN cDNA 4930426D05 gene                       | 1430143_at   | down | 5,326826  |
| Slitrk6            | 239250 SLIT and NTRK-like family, member 6             | 1437231_at   | down | 5,3244095 |
| Itga4              | 16401 integrin alpha 4                                 | 1421194_at   | down | 5,3044376 |
| Rarres1            | 109222 retinoic acid receptor responder (tazarotene ii | 1438055_at   | down | 5,1808944 |
| Dio2               | 13371 deiodinase, iodothyronine, type II               | 1418938_at   | down | 5,170079  |
| Trps1              | 83925 trichorhinophalangeal syndrome I (human)         | 1449530_at   | down | 5,129422  |
| Hey2               | 15214 hairy/enhancer-of-split related with YRPW mo     | 1418106_at   | down | 5,1278424 |
|                    |                                                        | 1446603_at   | down | 5,1232576 |
| Dusp4              | 319520 dual specificity phosphatase 4                  | 1428834_at   | down | 5,1175804 |
| Prex2              | 109294 phosphatidylinositol-3,4,5-trisphosphate-depe   | 1436569_at   | down | 5,018501  |
| 3222402N08Rik      | 74021 RIKEN cDNA 3222402N08 gene                       | 1432655_at   | down | 4,969268  |
| Lef1               | 16842 lymphoid enhancer binding factor 1               | 1421299_a_at | down | 4,952821  |
| Slc26a7            | 208890 solute carrier family 26, member 7              | 1425841_at   | down | 4,9147735 |
| 3110005L21Rik      | 73104 RIKEN cDNA 3110005L21 gene                       | 1453646_at   | down | 4,8987074 |
| Trps1              | 83925 trichorhinophalangeal syndrome I (human)         | 1438214_at   | down | 4,8789186 |
| Sox11              | 20666 SRY-box containing gene 11                       | 1429372_at   | down | 4,869876  |
| Wnt5a              | 22418 wingless-related MMTV integration site 5A        | 1436791_at   | down | 4,858532  |
|                    |                                                        | 1436398_at   | down | 4,848789  |
| Fgd5               | 232237 FYVE, RhoGEF and PH domain containing 5         | 1460578_at   | down | 4,823001  |
|                    |                                                        | 1441375_at   | down | 4,822474  |
| Wnt5a              | 22418 wingless-related MMTV integration site 5A        | 1448818_at   | down | 4,8201833 |
| Ccbe1              | 320924 collagen and calcium binding EGF domains 1      | 1453918_at   | down | 4,7633357 |
| Bmp7               | 12162 bone morphogenetic protein 7                     | 1432410_a_at | down | 4,7403517 |
| Spon1              | 233744 spondin 1, (f-spondin) extracellular matrix pr  | 1451342_at   | down | 4,7073817 |
|                    |                                                        | 1458947_at   | down | 4,603657  |
| 2610109H07Rik      | 70433 RIKEN cDNA 2610109H07 gene                       | 1456158_at   | down | 4,5898447 |
| Megf6              | 230971 multiple EGF-like-domains 6                     | 1437058_at   | down | 4,575191  |
| Efnb2              | 13642 ephrin B2                                        | 1449548_at   | down | 4,5531874 |
| Col23a1            | 237759 collagen, type XXIII, alpha 1                   | 1429210_at   | down | 4,535803  |
|                    |                                                        | 1447891_at   | down | 4,479655  |
| Itga8              | 241226 integrin alpha 8                                | 1427489_at   | down | 4,4717517 |
| Efnb2              | 13642 ephrin B2                                        | 1419638_at   | down | 4,464409  |
| Bmp7               | 12162 bone morphogenetic protein 7                     | 1418910_at   | down | 4,452212  |
| Efnb2              | 13642 ephrin B2                                        | 1419639_at   | down | 4,440879  |
| Itga8              | 241226 integrin alpha 8                                | 1454966_at   | down | 4,4278326 |
| Cnnm1              | 83674 cyclin M1                                        | 1443170_at   | down | 4,4044404 |
|                    |                                                        | 1459695_at   | down | 4,2977657 |
|                    |                                                        | 1446383_at   | down | 4,2976246 |
|                    |                                                        | 1437673_at   | down | 4,290999  |
| Spock1             | 20745 sparc/osteonectin, cwcv and kazal-like domai     | 1419672_at   | down | 4,269608  |
| Speg               | 11790 SPEG complex locus                               | 1448664_a_at | down | 4,202552  |
| Itga4              | 16401 integrin alpha 4                                 | 1436037_at   | down | 4,1982837 |
| Lphn3              | 319387 latrophilin 3                                   | 1460440_at   | down | 4,1704826 |
| Lef1               | 16842 lymphoid enhancer binding factor 1               | 1454734_at   | down | 4,1399627 |
| Satb2              | 212712 special AT-rich sequence binding protein 2      | 1425904_at   | down | 4,1268163 |
| Kif26b             | 269152 kinesin family member 26B                       | 1440990_at   | down | 4,112708  |
|                    |                                                        | 1460133_at   | down | 4,1111965 |
| Mpped2             | 77015 metallophosphoesterase domain containing 2       | 1435285_at   | down | 4,104734  |
| Shroom3            | 27428 shroom family member 3                           | 1422629_s_at | down | 4,092108  |
| Cd24a              | 12484 CD24a antigen                                    | 1448182_a_at | down | 4,0849314 |
| Cd24a              | 12484 CD24a antigen                                    | 1416034_at   | down | 4,0678425 |
| Cd24a              | 12484 CD24a antigen                                    | 1437502_x_at | down | 4,058933  |
| Fam134b            | 66270 family with sequence similarity 134, member      | 1424683_at   | down | 4,023445  |
|                    |                                                        | 1446484_at   | down | 4,0143332 |
| Etl4               | 208618 enhancer trap locus 4                           | 1440064_at   | down | 4,008549  |
| Prss23             | 76453 protease, serine, 23                             | 1431057_a_at | down | 3,9930344 |
| ENSMUSG00000074303 | 100038489 predicted gene, ENSMUSG00000074303           | 1436287_at   | down | 3,9898689 |
| Sox11              | 20666 SRY-box containing gene 11                       | 1429051_s_at | down | 3,989508  |
| Entpd1             | 12495 ectonucleoside triphosphate diphosphohydroly     | 1453586_at   | down | 3,9760787 |
| Ttyh1              | 57776 tweety homolog 1 (Drosophila)                    | 1422694_at   | down | 3,9709218 |
| Trps1              | 83925 trichorhinophalangeal syndrome I (human)         | 1434286_at   | down | 3,9692175 |
| 8430418B16Rik      | 71491 RIKEN cDNA 8430418B16 gene                       | 1433130_at   | down | 3,9161096 |
| Adams18            | 208936 a disintegrin-like and metallopeptidase (repro  | 1446247_at   | down | 3,89882   |
| Daam2              | 76441 dishevelled associated activator of morphoger    | 1455717_s_at | down | 3,8847482 |

|                                       |               |                                                   |              |      |           |
|---------------------------------------|---------------|---------------------------------------------------|--------------|------|-----------|
| 8030447M02Rik                         | 399578        | RIKEN cDNA 8030447M02 gene                        | 1458601_at   | down | 3,8759959 |
|                                       |               |                                                   | 1446172_at   | down | 3,8284621 |
| Mef2c                                 | 17260         | myocyte enhancer factor 2C                        | 1424852_at   | down | 3,8273158 |
| Emid2                                 | 140709        | EMI domain containing 2                           | 1425310_a_at | down | 3,8025134 |
| Sox18                                 | 20672         | SRY-box containing gene 18                        | 1449135_at   | down | 3,781732  |
| 100041195 /// 100041874 100036568 /// |               | predicted gene, 100041195 /// predicted gene      | 1428301_at   | down | 3,7733335 |
| C530014P21Rik                         | 399604        | RIKEN cDNA C530014P21 gene                        | 1447510_at   | down | 3,7688124 |
| Bmp4                                  | 12159         | bone morphogenetic protein 4                      | 1422912_at   | down | 3,756284  |
| Prlr                                  | 19116         | prolactin receptor                                | 1448556_at   | down | 3,7403152 |
| 6430537K16Rik                         | 320480        | RIKEN cDNA 6430537K16 gene                        | 1438878_at   | down | 3,7215025 |
| Fry                                   | 320365        | furry homolog (Drosophila)                        | 1456480_at   | down | 3,7122905 |
| LOC677224 /// Ubash3b                 | 677224 /// 72 | similar to RIKEN cDNA 2810457106 /// ubiquitin    | 1429475_at   | down | 3,7105694 |
| 2010111I01Rik                         | 72061         | RIKEN cDNA 2010111I01 gene                        | 1435089_at   | down | 3,6873431 |
| 9330159F19Rik                         | 212448        | RIKEN cDNA 9330159F19 gene                        | 1458379_at   | down | 3,669269  |
| Sdr16c6                               | 242286        | short chain dehydrogenase/reductase family        | 1457025_at   | down | 3,652356  |
| Satb2                                 | 212712        | special AT-rich sequence binding protein 2        | 1427017_at   | down | 3,6483057 |
| 100041195 /// 100041874 100036568 /// |               | predicted gene, 100041195 /// predicted gene      | 1452731_x_at | down | 3,6326046 |
| Tspan7                                | 21912         | tetraspanin 7                                     | 1448737_at   | down | 3,6246936 |
| Mllt3                                 | 70122         | myeloid/lymphoid or mixed-lineage leukemia        | 1453622_s_at | down | 3,6108937 |
| Mpped2                                | 77015         | metallophosphoesterase domain containing 2        | 1431751_a_at | down | 3,6107838 |
| Ndp                                   | 17986         | Norrie disease (pseudoglioma) (human)             | 1449251_at   | down | 3,6100245 |
| Pdlim3                                | 53318         | PDZ and LIM domain 3                              | 1449178_at   | down | 3,583547  |
|                                       |               |                                                   | 1451930_at   | down | 3,5691    |
| C030003D03Rik                         | 77220         | RIKEN cDNA C030003D03 gene                        | 1436304_at   | down | 3,5598605 |
|                                       |               |                                                   | 1443337_at   | down | 3,5598528 |
| 2010111I01Rik                         | 72061         | RIKEN cDNA 2010111I01 gene                        | 1460695_a_at | down | 3,5489194 |
| Mef2c                                 | 17260         | myocyte enhancer factor 2C                        | 1451507_at   | down | 3,5357955 |
| Hrc /// Tcfap2a                       | 15464 /// 214 | histidine rich calcium binding protein /// trans  | 1426048_s_at | down | 3,524866  |
| Dclk1                                 | 13175         | doublecortin-like kinase 1                        | 1451917_a_at | down | 3,499963  |
| Slco5a1                               | 240726        | solute carrier organic anion transporter family   | 1440874_at   | down | 3,4911792 |
| Ablim3                                | 319713        | actin binding LIM protein family, member 3        | 1434013_at   | down | 3,481431  |
| Hs3st3b1                              | 54710         | heparan sulfate (glucosamine) 3-O-sulfotrans      | 1433977_at   | down | 3,4714346 |
| Col8a1                                | 12837         | collagen, type VIII, alpha 1                      | 1418441_at   | down | 3,4628618 |
| Dclk1                                 | 13175         | doublecortin-like kinase 1                        | 1435940_at   | down | 3,4576414 |
| Pon2                                  | 330260        | paraoxonase 2                                     | 1429020_at   | down | 3,4509447 |
|                                       |               |                                                   | 1446293_at   | down | 3,4455857 |
| Crabp1                                | 12903         | cellular retinoic acid binding protein I          | 1448326_a_at | down | 3,4377575 |
| Nipsnap1                              | 18082         | 4-nitrophenylphosphatase domain and non-ne        | 1456748_a_at | down | 3,4325151 |
| Clstn2                                | 64085         | calsyntenin 2                                     | 1422158_at   | down | 3,423178  |
| Edaradd                               | 171211        | EDAR (ectodysplasin-A receptor)-associated c      | 1437800_at   | down | 3,4229245 |
|                                       |               |                                                   | 1442859_at   | down | 3,4014542 |
| Cep135                                | 381644        | centrosomal protein 135                           | 1444201_at   | down | 3,3945663 |
| Prkch                                 | 18755         | protein kinase C, eta                             | 1422079_at   | down | 3,3938315 |
| Wnt5a                                 | 22418         | wingless-related MMTV integration site 5A         | 1456976_at   | down | 3,3922718 |
| Mllt3                                 | 70122         | myeloid/lymphoid or mixed-lineage leukemia        | 1429205_at   | down | 3,3907666 |
| Col8a1                                | 12837         | collagen, type VIII, alpha 1                      | 1455627_at   | down | 3,3888524 |
|                                       |               |                                                   | 1435479_at   | down | 3,3877387 |
| Sgip1                                 | 73094         | SH3-domain GRB2-like (endophilin) interactin      | 1444225_at   | down | 3,3858287 |
| Efna5                                 | 13640         | ephrin A5                                         | 1436866_at   | down | 3,3823822 |
| Serpine2                              | 20720         | serine (or cysteine) peptidase inhibitor, clade   | 1416666_at   | down | 3,3659906 |
| 1110059G02Rik                         | 68786         | RIKEN cDNA 1110059G02 gene                        | 1438288_x_at | down | 3,3659568 |
| Rapgef4                               | 56508         | Rap guanine nucleotide exchange factor (GEF       | 1425518_at   | down | 3,3651881 |
| Dkk2                                  | 56811         | dickkopf homolog 2 (Xenopus laevis)               | 1420512_at   | down | 3,3528092 |
| Limch1                                | 77569         | LIM and calponin homology domains 1               | 1435106_at   | down | 3,3527777 |
| Limch1                                | 77569         | LIM and calponin homology domains 1               | 1453802_at   | down | 3,3314316 |
|                                       |               |                                                   | 1459453_at   | down | 3,3259227 |
| LOC677224                             | 677224        | similar to RIKEN cDNA 2810457106                  | 1435703_at   | down | 3,3223245 |
| Slc25a27                              | 74011         | solute carrier family 25, member 27               | 1454230_a_at | down | 3,3155212 |
| Inpp4b                                | 234515        | inositol polyphosphate-4-phosphatase, type I      | 1457359_at   | down | 3,314044  |
|                                       |               |                                                   | 1444841_at   | down | 3,3060517 |
| Sostdc1                               | 66042         | sclerostin domain containing 1                    | 1449340_at   | down | 3,2953782 |
| Btbd11                                | 74007         | BTB (POZ) domain containing 11                    | 1428377_at   | down | 3,293124  |
| Runx1                                 | 12394         | runt related transcription factor 1               | 1422864_at   | down | 3,287046  |
|                                       |               |                                                   | 1434683_at   | down | 3,281955  |
| Sorbs1                                | 20411         | sorbin and SH3 domain containing 1                | 1428471_at   | down | 3,2779431 |
| Limch1                                | 77569         | LIM and calponin homology domains 1               | 1435321_at   | down | 3,2764692 |
| X99384                                | 27355         | cDNA sequence X99384                              | 1448134_at   | down | 3,273121  |
| Dclk1                                 | 13175         | doublecortin-like kinase 1                        | 1423125_at   | down | 3,2634218 |
| Bcl11a                                | 14025         | B-cell CLL/lymphoma 11A (zinc finger protein      | 1456632_at   | down | 3,2524757 |
| Gfra1                                 | 14585         | glial cell line derived neurotrophic factor famil | 1439015_at   | down | 3,2518718 |
| Mycn                                  | 18109         | v-myc myelocytomatosis viral related oncogene     | 1417155_at   | down | 3,2372067 |
| Nkd2                                  | 72293         | naked cuticle 2 homolog (Drosophila)              | 1419466_at   | down | 3,2108319 |
| Tmem204                               | 407831        | transmembrane protein 204                         | 1436698_x_at | down | 3,1935813 |
|                                       |               |                                                   | 1440069_at   | down | 3,1907682 |



|                                       |                                             |                                                 |               |           |           |
|---------------------------------------|---------------------------------------------|-------------------------------------------------|---------------|-----------|-----------|
| Nkd2                                  | 72293                                       | naked cuticle 2 homolog (Drosophila)            | 1434275_at    | down      | 3,1880872 |
| Kank4                                 | 242553                                      | KN motif and ankyrin repeat domains 4           | 1436425_at    | down      | 3,1856346 |
| 1110059G02Rik                         | 68786                                       | RIKEN cDNA 1110059G02 gene                      | 1435987_x_at  | down      | 3,180592  |
| Chodl                                 | 246048                                      | chondrolectin                                   | 1451440_at    | down      | 3,1733556 |
| Dclk1                                 | 13175                                       | doublecortin-like kinase 1                      | 1450863_a_at  | down      | 3,1710317 |
| Cnnm1                                 | 83674                                       | cyclin M1                                       | 1441312_at    | down      | 3,1705098 |
| Mtss1                                 | 211401                                      | metastasis suppressor 1                         | 1424826_s_at  | down      | 3,166502  |
| Ezr                                   | 22350                                       | ezrin                                           | 1450850_at    | down      | 3,1616569 |
| St8sia2                               | 20450                                       | ST8 alpha-N-acetyl-neuraminide alpha-2,8-si     | 1420377_at    | down      | 3,156094  |
| Rspo1                                 | 192199                                      | R-spondin homolog (Xenopus laevis)              | 1449319_at    | down      | 3,1548786 |
| Serpnb5                               | 20724                                       | serine (or cysteine) peptidase inhibitor, clade | 1441941_x_at  | down      | 3,1538353 |
| LOC552901                             | 552901                                      | hypothetical LOC552901                          | 1458505_at    | down      | 3,148919  |
|                                       |                                             |                                                 | 1446395_at    | down      | 3,1430042 |
| Tmem117                               | 320709                                      | transmembrane protein 117                       | 1433615_at    | down      | 3,1404984 |
|                                       |                                             |                                                 | 1442632_at    | down      | 3,1401694 |
|                                       |                                             |                                                 | 1459289_at    | down      | 3,1394026 |
| Cacna2d2                              | 56808                                       | calcium channel, voltage-dependent, alpha 2/    | 1450754_at    | down      | 3,132764  |
| Mtss1                                 | 211401                                      | metastasis suppressor 1                         | 1434036_at    | down      | 3,1222258 |
| D3Bwg0562e                            | 229791                                      | DNA segment, Chr 3, Brigham & Women's Ge        | 1427247_at    | down      | 3,1094766 |
| Rspo3                                 | 72780                                       | R-spondin 3 homolog (Xenopus laevis), mRN       | 1443187_at    | down      | 3,1046932 |
| A730089K16Rik                         | 320411                                      | RIKEN cDNA A730089K16 gene                      | 1437263_at    | down      | 3,1038442 |
| Prss23                                | 76453                                       | protease, serine, 23                            | 1446560_at    | down      | 3,1037235 |
| 4930588G05Rik                         | 78817                                       | RIKEN cDNA 4930588G05 gene                      | 1430175_at    | down      | 3,097917  |
| Spred1                                | 114715                                      | Spred-1                                         | 1445228_at    | down      | 3,094401  |
| Elov14                                | 83603                                       | elongation of very long chain fatty acids (FEN  | 1451308_at    | down      | 3,093332  |
| Crabp2                                | 12904                                       | cellular retinoic acid binding protein II       | 1451191_at    | down      | 3,0927272 |
| Mef2c                                 | 17260                                       | myocyte enhancer factor 2C                      | 1421027_a_at  | down      | 3,0922196 |
| 6720418B01Rik                         | 77892                                       | RIKEN cDNA 6720418B01 gene                      | 1430448_at    | down      | 3,0859406 |
| Serpnb5                               | 20724                                       | serine (or cysteine) peptidase inhibitor, clade | 1424623_at    | down      | 3,0817635 |
| Perp                                  | 64058                                       | PERP, TP53 apoptosis effector                   | 1416271_at    | down      | 3,0797935 |
| Akap2                                 | 11641                                       | A kinase (PRKA) anchor protein 2                | 1455870_at    | down      | 3,06605   |
| Itga4                                 | 16401                                       | integrin alpha 4                                | 1456498_at    | down      | 3,06423   |
| D7Ertd715e                            | 52480                                       | DNA segment, Chr 7, ERATO Doi 715, expres:      | 1455087_at    | down      | 3,0568333 |
|                                       |                                             |                                                 | 1445954_at    | down      | 3,0515568 |
| Mef2c                                 | 17260                                       | myocyte enhancer factor 2C                      | 1451506_at    | down      | 3,0377862 |
| Ebf4                                  | 228598                                      | early B-cell factor 4                           | 1435044_at    | down      | 3,0365949 |
| Tubb4                                 | 22153                                       | tubulin, beta 4                                 | 1423221_at    | down      | 3,0360806 |
| Gpr123                                | 52389                                       | G protein-coupled receptor 123                  | 1459750_s_at  | down      | 3,034233  |
| Robo1                                 | 19876                                       | roundabout homolog 1 (Drosophila)               | 1427231_at    | down      | 3,0227907 |
| Zfp365                                | 216049                                      | zinc finger protein 365                         | 1433583_at    | down      | 3,019458  |
| Glrb                                  | 14658                                       | glycine receptor, beta subunit                  | 1422504_at    | down      | 3,0142612 |
| Smoc1                                 | 64075                                       | SPARC related modular calcium binding 1         | 1448321_at    | down      | 3,011778  |
| LOC100045106 /// Vstm2k 100045106 /// | hypothetical protein LOC100045106 /// V-set | 1419118_at                                      | down          | 3,0101628 |           |
| Sox21                                 | 223227                                      | SRY-box containing gene 21                      | 1437059_at    | down      | 3,0096796 |
| Ngfr                                  | 18053                                       | nerve growth factor receptor (TNFR superfam     | 1450177_at    | down      | 3,0004706 |
| Kif5c                                 | 16574                                       | kinesin family member 5C                        | 1455266_at    | down      | 2,9973233 |
| Rapgef4                               | 56508                                       | Rap guanine nucleotide exchange factor (GEF     | 1421622_a_at  | down      | 2,9968548 |
| 2210408K08Rik                         | 108743                                      | RIKEN cDNA 2210408K08 gene                      | 1437087_at    | down      | 2,9943323 |
| Robo2                                 | 268902                                      | roundabout homolog 2 (Drosophila)               | 1458229_at    | down      | 2,9863267 |
| Rnf144b                               | 218215                                      | ring finger protein 144B                        | 1439153_at    | down      | 2,9818234 |
| Efna5                                 | 13640                                       | ephrin A5                                       | 1421796_a_at  | down      | 2,9811304 |
| Tub                                   | 22141                                       | tubby candidate gene                            | 1420925_at    | down      | 2,9749398 |
| Wispl                                 | 22402                                       | WNT1 inducible signaling pathway protein 1      | 1448594_at    | down      | 2,9707313 |
| Pof1b                                 | 69693                                       | premature ovarian failure 1B                    | 1427492_at    | down      | 2,9617722 |
| Fam155a                               | 270028                                      | family with sequence similarity 155, member     | 1435138_at    | down      | 2,952587  |
| Cacna2d3                              | 12294                                       | calcium channel, voltage-dependent, alpha2/c    | 1419225_at    | down      | 2,9463243 |
| B4galnt1                              | 14421                                       | beta-1,4-N-acetyl-galactosaminyl transferase    | 1418655_at    | down      | 2,9444647 |
| Arap2                                 | 212285                                      | ArfGAP with RhoGAP domain, ankyrin repeat :     | 1436895_at    | down      | 2,934761  |
| 1110059G02Rik                         | 68786                                       | RIKEN cDNA 1110059G02 gene                      | 1436204_at    | down      | 2,9312515 |
| Spon1                                 | 233744                                      | spondin 1, (f-spondin) extracellular matrix pr  | 1441226_at    | down      | 2,925729  |
| Lxn                                   | 17035                                       | latexin                                         | 1416503_at    | down      | 2,9213474 |
| Apcdd1                                | 494504                                      | adenomatosis polyposis coli down-regulated      | 11418382_at   | down      | 2,9196274 |
| Tle4                                  | 21888                                       | transducin-like enhancer of split 4, homolog c  | 1430384_at    | down      | 2,9147658 |
| Dclk1                                 | 13175                                       | doublecortin-like kinase 1                      | 1424271_at    | down      | 2,9117265 |
| Flrt1                                 | 396184                                      | fibronectin leucine rich transmembrane protei   | 1443143_at    | down      | 2,9111626 |
| Pde7b                                 | 29863                                       | CAMP specific phosphodiesterase 7B (PDE7B       | 1445539_at    | down      | 2,9081252 |
| Robo1                                 | 19876                                       | roundabout homolog 1 (Drosophila)               | 1457407_at    | down      | 2,9043167 |
| Myocd                                 | 214384                                      | myocardin                                       | 1425978_at    | down      | 2,9000034 |
| Emid1                                 | 140703                                      | EMI domain containing 1                         | 1449581_at    | down      | 2,8965204 |
| Apcdd1                                | 494504                                      | adenomatosis polyposis coli down-regulated      | 11449070_x_at | down      | 2,8960326 |
| Cd200                                 | 17470                                       | CD200 antigen                                   | 1448788_at    | down      | 2,8925877 |
|                                       |                                             |                                                 | 1459304_at    | down      | 2,8857133 |
|                                       |                                             |                                                 | 1459389_at    | down      | 2,8840916 |
| C530014P21Rik                         | 399604                                      | RIKEN cDNA C530014P21 gene                      | 1441577_at    | down      | 2,882286  |

|               |                                                       |              |      |           |
|---------------|-------------------------------------------------------|--------------|------|-----------|
| Plod2         | 26432 procollagen lysine, 2-oxoglutarate 5-dioxygen   | 1416687_at   | down | 2,8805656 |
| Apcdd1        | 494504 adenomatosis polyposis coli down-regulated 1   | 1418383_at   | down | 2,8797998 |
|               |                                                       | 1440015_at   | down | 2,87798   |
| Stmn2         | 20257 stathmin-like 2                                 | 1423281_at   | down | 2,877706  |
| Fli1          | 14247 Friend leukemia integration 1                   | 1433512_at   | down | 2,8769767 |
| Plk2          | 20620 polo-like kinase 2 (Drosophila)                 | 1427005_at   | down | 2,8668475 |
| Lass6         | 241447 LAG1 homolog, ceramide synthase 6              | 1434418_at   | down | 2,8659105 |
| Cytsb         | 432572 cytospin B                                     | 1458440_at   | down | 2,8647766 |
| 4833419E13Rik | 74579 RIKEN cDNA 4833419E13 gene                      | 1431480_at   | down | 2,8628824 |
| Pgbd5         | 209966 piggyBac transposable element derived 5        | 1460570_at   | down | 2,842901  |
|               |                                                       | 1444227_at   | down | 2,8407512 |
| 2010011120Rik | 67017 RIKEN cDNA 2010011120 gene                      | 1451450_at   | down | 2,8404536 |
| Lonrf2        | 381338 LON peptidase N-terminal domain and ring fir   | 1429965_at   | down | 2,8401444 |
| Dkk1          | 13380 dickkopf homolog 1 (Xenopus laevis)             | 1458232_at   | down | 2,8398345 |
|               |                                                       | 1444904_at   | down | 2,8379772 |
| Bcl11a        | 14025 B-cell CLL/lymphoma 11A (zinc finger protein    | 1453814_at   | down | 2,8341265 |
| Aqp1          | 11826 aquaporin 1                                     | 1416203_at   | down | 2,824845  |
|               |                                                       | 1420287_at   | down | 2,8175924 |
| Ucn2          | 171530 urocortin 2                                    | 1450607_s_at | down | 2,8175087 |
| Unc5b         | 107449 unc-5 homolog B (C. elegans)                   | 1435110_at   | down | 2,8131213 |
| 4832441B07Rik | 76861 RIKEN cDNA 4832441B07 gene                      | 1429997_at   | down | 2,8071685 |
| Kdr           | 16542 kinase insert domain protein receptor           | 1449379_at   | down | 2,8020391 |
|               |                                                       | 1457376_at   | down | 2,8018386 |
|               |                                                       | 1443174_at   | down | 2,7965443 |
| Prlr          | 19116 prolactin receptor                              | 1437397_at   | down | 2,7930083 |
| 2010011120Rik | 67017 RIKEN cDNA 2010011120 gene                      | 1424694_at   | down | 2,7916737 |
| Fam174b       | 100038347 family with sequence similarity 174, member | 1434273_at   | down | 2,7845373 |
| Limch1        | 77569 LIM and calponin homology domains 1 (Limch      | 1440776_at   | down | 2,7822893 |
| Zdhhc2        | 70546 zinc finger, DHHC domain containing 2           | 1452656_at   | down | 2,781918  |
| Fli1          | 14247 Friend leukemia integration 1                   | 1422024_at   | down | 2,776271  |
| 4930403O15Rik | 73814 RIKEN cDNA 4930403O15 gene                      | 1432251_at   | down | 2,768407  |
| Nav2          | 78286 neuron navigator 2                              | 1444780_at   | down | 2,768313  |
| Dtx4          | 207521 deltex 4 homolog (Drosophila)                  | 1455711_at   | down | 2,7650523 |
| 2610307P16Rik | 72518 RIKEN cDNA 2610307P16 gene                      | 1430083_at   | down | 2,7632208 |
| Ralgps2       | 78255 Ral GEF with PH domain and SH3 binding mot      | 1431704_a_at | down | 2,7626686 |
| 4732423E21Rik | 106967 RIKEN cDNA 4732423E21 gene                     | 1442903_at   | down | 2,758998  |
|               |                                                       | 1443364_at   | down | 2,755903  |
| Capns2        | 69543 calpain, small subunit 2                        | 1429067_at   | down | 2,7450783 |
| Syne1         | 64009 synaptic nuclear envelope 1                     | 1421545_a_at | down | 2,739884  |
| Ets1          | 23871 E26 avian leukemia oncogene 1, 5' domain        | 1452163_at   | down | 2,7369041 |
|               |                                                       | 1440587_at   | down | 2,7256353 |
| Scube3        | 268935 signal peptide, CUB domain, EGF-like 3         | 1436002_at   | down | 2,7192953 |
|               |                                                       | 1427600_at   | down | 2,718383  |
| Col13a1       | 12817 collagen, type XIII, alpha 1                    | 1422866_at   | down | 2,716082  |
|               |                                                       | 1446682_at   | down | 2,7150257 |
| B3gnt2        | 53625 UDP-GlcNAc:betaGal beta-1,3-N-acetylglucos:     | 1450026_a_at | down | 2,7141125 |
| Cdh2          | 12558 cadherin 2                                      | 1418815_at   | down | 2,7128541 |
| Dclk1         | 13175 doublecortin-like kinase 1                      | 1424270_at   | down | 2,711567  |
| Lamc3         | 23928 laminin gamma 3                                 | 1425594_at   | down | 2,711251  |
| Dclk1         | 13175 doublecortin-like kinase 1                      | 1451289_at   | down | 2,7104592 |
| AY512938      | 791388 cDNA sequence AY512938                         | 1458551_at   | down | 2,704252  |
|               |                                                       | 1445713_at   | down | 2,698844  |
| Snap91        | 20616 synaptosomal-associated protein 91              | 1416688_at   | down | 2,694785  |
| Runx3         | 12399 runt related transcription factor 3             | 1440275_at   | down | 2,686543  |
| Vwa2          | 240675 von Willebrand factor A domain containing 2    | 1438567_at   | down | 2,6846986 |
| Etl4          | 208618 enhancer trap locus 4                          | 1426880_at   | down | 2,6802342 |
| Mtss1         | 211401 metastasis suppressor 1                        | 1440847_at   | down | 2,6792107 |
| Psapl1        | 76943 prosaposin-like 1                               | 1440186_s_at | down | 2,675199  |
|               |                                                       | 1436218_at   | down | 2,6721058 |
| Ccr1          | 252837 chemokine (C-C motif) receptor-like 1          | 1426139_a_at | down | 2,6606688 |
| Rassf10       | 78748 Ras association (RalGDS/AF-6) domain family     | 1457140_s_at | down | 2,6592638 |
| Megf10        | 70417 multiple EGF-like-domains 10                    | 1429841_at   | down | 2,6585882 |
|               |                                                       | 1458823_at   | down | 2,652342  |
| Syne1         | 64009 synaptic nuclear envelope 1                     | 1455493_at   | down | 2,651904  |
| Sorbs1        | 20411 sorbin and SH3 domain containing 1              | 1436737_a_at | down | 2,6471148 |
| Adrbk2        | 320129 adrenergic receptor kinase, beta 2             | 1434450_s_at | down | 2,6424506 |
| Nav2          | 78286 neuron navigator 2                              | 1435981_at   | down | 2,6417627 |
| Bcl11a        | 14025 B-cell CLL/lymphoma 11A (zinc finger protein    | 1457072_at   | down | 2,6406693 |
| 6330403K07Rik | 103712 RIKEN cDNA 6330403K07 gene                     | 1426766_at   | down | 2,640151  |
| Fryl          | 72313 furry homolog-like (Drosophila)                 | 1458233_at   | down | 2,6388087 |
| Ralgps2       | 78255 CDNA clone IMAGE:6828107                        | 1428789_at   | down | 2,6355622 |
| Rgnef         | 110596 Rho-guanine nucleotide exchange factor         | 1419458_at   | down | 2,6353016 |
| Cpne5         | 240058 copine V                                       | 1442166_at   | down | 2,6318507 |
| 4833406M21Rik | 74575 RIKEN cDNA 4833406M21 gene                      | 1432686_at   | down | 2,6314144 |

|                     |                                                                     |              |      |           |
|---------------------|---------------------------------------------------------------------|--------------|------|-----------|
| Runx1               | 12394 runt related transcription factor 1                           | 1422865_at   | down | 2,630435  |
| 1110059G02Rik       | 68786 RIKEN cDNA 1110059G02 gene                                    | 1436203_a_at | down | 2,62672   |
| Alpl                | 11647 alkaline phosphatase, liver/bone/kidney                       | 1423611_at   | down | 2,6240716 |
| Adrbk2              | 320129 adrenergic receptor kinase, beta 2                           | 1440801_s_at | down | 2,6214306 |
| Scel                | 64929 sciellin                                                      | 1422837_at   | down | 2,6180148 |
| Trib2               | 217410 tribbles homolog 2 (Drosophila)                              | 1426641_at   | down | 2,612232  |
| C030046M01Rik       | 77476 RIKEN cDNA C030046M01 gene                                    | 1454565_at   | down | 2,6121697 |
| Tcfap2a             | 21418 transcription factor AP-2, alpha                              | 1421996_at   | down | 2,6120925 |
| A130064L14Rik       | 320257 RIKEN cDNA A130064L14 gene                                   | 1444343_at   | down | 2,6108322 |
| Arl4c /// LOC632433 | 320982 /// 63 ADP-ribosylation factor-like 4C /// similar to A      | 1436512_at   | down | 2,6079936 |
|                     |                                                                     | 1446721_at   | down | 2,6048443 |
| Esrp1               | 207920 epithelial splicing regulatory protein 1                     | 1454681_at   | down | 2,5977418 |
|                     |                                                                     | 1440121_at   | down | 2,596009  |
| Rassf9              | 237504 Ras association (RalGDS/AF-6) domain family                  | 1427942_at   | down | 2,5915484 |
|                     |                                                                     | 1442675_at   | down | 2,5893838 |
| Meox2               | 17286 mesenchyme homeobox 2                                         | 1424234_s_at | down | 2,5892103 |
| Trib2               | 217410 tribbles homolog 2 (Drosophila)                              | 1426640_s_at | down | 2,5883665 |
| Shisa2              | 219134 shisa homolog 2 (Xenopus laevis)                             | 1423851_a_at | down | 2,5878716 |
| St8sia2             | 20450 ST8 alpha-N-acetyl-neuraminide alpha-2,8-si                   | 1449843_at   | down | 2,586979  |
|                     |                                                                     | 1420286_at   | down | 2,586974  |
| Ccdc3               | 74186 coiled-coil domain containing 3                               | 1428549_at   | down | 2,5757678 |
| Tmem35              | 67564 transmembrane protein 35                                      | 1416710_at   | down | 2,5725722 |
| Nkd1                | 93960 naked cuticle 1 homolog (Drosophila)                          | 1429506_at   | down | 2,572057  |
|                     |                                                                     | 1440219_at   | down | 2,56573   |
| A730054J21Rik       | 320862 RIKEN cDNA A730054J21 gene                                   | 1438531_at   | down | 2,5560725 |
| Nhedc2              | 97086 Na <sup>+</sup> /H <sup>+</sup> exchanger domain containing 2 | 1439995_at   | down | 2,5559669 |
| Agrn                | 11603 agrin                                                         | 1426670_at   | down | 2,5512607 |
| Scrn1               | 69938 secernin 1                                                    | 1428718_at   | down | 2,5509176 |
| C030009J22Rik       | 320436 RIKEN cDNA C030009J22 gene                                   | 1458386_at   | down | 2,5421827 |
| Dkk1                | 13380 dickkopf homolog 1 (Xenopus laevis)                           | 1420360_at   | down | 2,5379176 |
| Dab1                | 13131 disabled homolog 1 (Drosophila)                               | 1427308_at   | down | 2,5368109 |
| Plod2               | 26432 procollagen lysine, 2-oxoglutarate 5-dioxygen                 | 1416686_at   | down | 2,535002  |
| Col19a1             | 12823 collagen, type XIX, alpha 1                                   | 1430676_at   | down | 2,5346289 |
| Zbtb20              | 56490 zinc finger and BTB domain containing 20                      | 1443471_at   | down | 2,532204  |
| C130090K23Rik       | 231293 RIKEN cDNA C130090K23 gene                                   | 1426268_at   | down | 2,5291626 |
|                     |                                                                     | 1458730_at   | down | 2,5282261 |
| Col4a6              | 94216 collagen, type IV, alpha 6                                    | 1421007_at   | down | 2,5276017 |
|                     |                                                                     | 1442966_at   | down | 2,524462  |
| Dmd                 | 13405 dystrophin, muscular dystrophy                                | 1417307_at   | down | 2,5244582 |
| Daam2               | 76441 dishevelled associated activator of morphogen                 | 1430247_at   | down | 2,521875  |
| C630043F03Rik       | 68285 RIKEN cDNA C630043F03 gene                                    | 1433762_at   | down | 2,5133243 |
| 2610027H17Rik       | 71811 RIKEN cDNA 2610027H17 gene                                    | 1442445_at   | down | 2,510252  |
| Lphn3               | 319387 latrophilin 3                                                | 1428523_at   | down | 2,505699  |
| Zswim6              | 67263 Zinc finger, SWIM domain containing 6 (Zswir                  | 1459722_at   | down | 2,501333  |
| Gdpd1               | 66569 glycerophosphodiester phosphodiesterase dor                   | 1424076_at   | down | 2,5009234 |
| A230048O21Rik       | 320959 RIKEN cDNA A230048O21 gene                                   | 1441562_at   | down | 2,492521  |
| Cblb                | 208650 Casitas B-lineage lymphoma b                                 | 1458469_at   | down | 2,4913714 |
| Drp2                | 13497 dystrophin related protein 2                                  | 1440452_at   | down | 2,4882958 |
| Spred1              | 114715 sprouty protein with EVH-1 domain 1, related                 | 1423161_s_at | down | 2,4856281 |
|                     |                                                                     | 1443026_at   | down | 2,4787664 |
| AI481207            | 105188 expressed sequence AI481207                                  | 1444587_at   | down | 2,473709  |
| Tanc1               | 66860 tetratricopeptide repeat, ankyrin repeat and c                | 1452714_at   | down | 2,4699593 |
| Efnb2               | 13642 ephrin B2                                                     | 1449549_at   | down | 2,4619884 |
| Ubash3b             | 72828 ubiquitin associated and SH3 domain containi                  | 1436805_at   | down | 2,4598985 |
| Spred1              | 114715 sprouty protein with EVH-1 domain 1, related                 | 1428777_at   | down | 2,4567564 |
| Edn3                | 13616 endothelin 3                                                  | 1438696_at   | down | 2,4557233 |
| Glis3               | 226075 GLIS family zinc finger 3                                    | 1430353_at   | down | 2,4537642 |
| Fryl                | 72313 furry homolog-like (Drosophila)                               | 1427199_at   | down | 2,4519496 |
| Ednrb               | 13618 endothelin receptor type B                                    | 1423594_a_at | down | 2,4488652 |
| C030003D03Rik       | 77220 RIKEN cDNA C030003D03 gene                                    | 1431116_at   | down | 2,4470992 |
| Spint2              | 20733 serine protease inhibitor, Kunitz type 2                      | 1438968_x_at | down | 2,4463613 |
|                     |                                                                     | 1440446_at   | down | 2,4451454 |
| Masp1               | 17174 mannan-binding lectin serine peptidase 1                      | 1425985_s_at | down | 2,4435573 |
| A230048O21Rik       | 320959 RIKEN cDNA A230048O21 gene                                   | 1458051_at   | down | 2,44251   |
| Sox9                | 20682 SRY-box containing gene 9                                     | 1451538_at   | down | 2,4415913 |
| Chd7                | 320790 chromodomain helicase DNA binding protein 7                  | 1448026_at   | down | 2,4414697 |
| Hdac9               | 79221 histone deacetylase 9                                         | 1434572_at   | down | 2,4370043 |
| 6720401G13Rik       | 103012 RIKEN cDNA 6720401G13 gene                                   | 1435744_at   | down | 2,4369943 |
| Tcf7                | 21414 transcription factor 7, T-cell specific                       | 1433471_at   | down | 2,4325566 |
| Lfng                | 16848 LFNG O-fucosylpeptide 3-beta-N-acetylglucos                   | 1420643_at   | down | 2,4321642 |
| 2600014E21Rik       | 72134 RIKEN cDNA 2600014E21 gene                                    | 1430946_at   | down | 2,432108  |
| 9430018C23Rik       | 77267 RIKEN cDNA 9430018C23 gene                                    | 1454512_at   | down | 2,4317722 |
| 9430081I23Rik       | 320242 RIKEN cDNA 9430081I23 gene                                   | 1446088_at   | down | 2,429066  |
| Tmtc1               | 387314 transmembrane and tetratricopeptide repeat                   | 1435261_at   | down | 2,4278579 |

|                        |                                                             |                               |            |           |           |
|------------------------|-------------------------------------------------------------|-------------------------------|------------|-----------|-----------|
| 5730409N24Rik          | 70485 RIKEN cDNA 5730409N24 gene                            | 1430362_at                    | down       | 2,427774  |           |
| Entpd2                 | 12496 ectonucleoside triphosphate diphosphohydroly          | 1418259_a_at                  | down       | 2,427222  |           |
| Plxnb1                 | 235611 plexin B1                                            | 1435254_at                    | down       | 2,4210067 |           |
| Zfp238                 | 30928 zinc finger protein 238                               | 1417010_at                    | down       | 2,4182632 |           |
| Prmt8                  | 381813 protein arginine N-methyltransferase 8               | 1435204_at                    | down       | 2,417676  |           |
| 9430087B13Rik          | 77437 RIKEN cDNA 9430087B13 gene                            | 1433321_at                    | down       | 2,4145908 |           |
| Dst                    | 13518 dystonin                                              | 1421117_at                    | down       | 2,4128778 |           |
| Emilin3                | 280635 elastin microfibril interfacier 3                    | 1436965_at                    | down       | 2,4127362 |           |
| Meox2                  | 17286 mesenchyme homeobox 2                                 | 1424233_at                    | down       | 2,4103322 |           |
| Gpc2                   | 71951 glypican 2 (cerebroglycan)                            | 1429293_at                    | down       | 2,4102075 |           |
|                        |                                                             | 1446953_at                    | down       | 2,409081  |           |
| Tcf4                   | 21413 Transcription factor 4, mRNA (cDNA clone MG           | 1458201_at                    | down       | 2,4064906 |           |
| Rassf3                 | 192678 Ras association (RalGDS/AF-6) domain family          | 1448546_at                    | down       | 2,4047832 |           |
| Mtus1                  | 102103 mitochondrial tumor suppressor 1                     | 1454824_s_at                  | down       | 2,4038467 |           |
| Pde2a                  | 207728 phosphodiesterase 2A, cGMP-stimulated                | 1447707_s_at                  | down       | 2,4023225 |           |
| Zdhhc2                 | 70546 zinc finger, DHHC domain containing 2                 | 1452654_at                    | down       | 2,3999906 |           |
| Arhgef5                | 54324 Rho guanine nucleotide exchange factor (GEF           | 1452304_a_at                  | down       | 2,399439  |           |
| Sox4                   | 20677 SRY-box containing gene 4                             | 1433575_at                    | down       | 2,3949451 |           |
| 2900011L18Rik          | 77082 RIKEN cDNA 2900011L18 gene                            | 1432758_at                    | down       | 2,393961  |           |
| 5330421C15Rik          | 78279 RIKEN cDNA 5330421C15 gene                            | 1432920_at                    | down       | 2,3920918 |           |
| Myo10                  | 17909 myosin X                                              | 1422544_at                    | down       | 2,387685  |           |
| Btdb11                 | 74007 BTB (POZ) domain containing 11                        | 1459838_s_at                  | down       | 2,3867276 |           |
| Dclk1                  | 13175 doublecortin-like kinase 1                            | 1446190_at                    | down       | 2,3827229 |           |
|                        |                                                             | 1457954_at                    | down       | 2,3818214 |           |
|                        |                                                             | 1440461_at                    | down       | 2,3817618 |           |
| Mgat5                  | 107895 mannoside acetylglucosaminyltransferase 5            | 1428643_at                    | down       | 2,3772736 |           |
| Nrcam                  | 319504 neuron-glia-CAM-related cell adhesion molecu         | 1434709_at                    | down       | 2,3727646 |           |
| Ets1                   | 23871 E26 avian leukemia oncogene 1, 5' domain              | 1426725_s_at                  | down       | 2,3670537 |           |
| 4933431K23Rik          | 74475 RIKEN cDNA 4933431K23 gene                            | 1453916_at                    | down       | 2,3597276 |           |
| Slco4a1                | 108115 solute carrier organic anion transporter family      | 1438160_x_at                  | down       | 2,3583894 |           |
|                        |                                                             | 1440578_at                    | down       | 2,3573973 |           |
| Ccr11                  | 252837 Chemokine (C-C motif) receptor-like 1 (Ccr11)        | 1437668_at                    | down       | 2,3555496 |           |
| Fam19a2                | 268354 family with sequence similarity 19, member A         | 1438007_at                    | down       | 2,3553805 |           |
| Sh3rf3                 | 237353 SH3 domain containing ring finger 3                  | 1456946_at                    | down       | 2,354621  |           |
| Dab1                   | 13131 disabled homolog 1 (Drosophila)                       | 1427307_a_at                  | down       | 2,351711  |           |
|                        |                                                             | 1442276_at                    | down       | 2,3419228 |           |
| Cap2                   | 67252 CAP, adenylate cyclase-associated protein, 2          | 1450910_at                    | down       | 2,3416212 |           |
| Dsp                    | 109620 desmoplakin                                          | 1435493_at                    | down       | 2,3399804 |           |
| Tnfrsf21               | 94185 tumor necrosis factor receptor superfamily, m         | 1450731_s_at                  | down       | 2,3390703 |           |
| 2610109H07Rik          | 70433 RIKEN cDNA 2610109H07 gene                            | 1432152_at                    | down       | 2,3390553 |           |
| Plscr1                 | 22038 phospholipid scramblase 1                             | 1453181_x_at                  | down       | 2,3365674 |           |
| 9430019C24Rik          | 77279 RIKEN cDNA 9430019C24 gene                            | 1453458_at                    | down       | 2,3354018 |           |
| Mfsd6                  | 98682 major facilitator superfamily domain containir        | 1424464_s_at                  | down       | 2,3306463 |           |
| Atad2                  | 70472 ATPase family, AAA domain containing 2                | 1443229_at                    | down       | 2,328408  |           |
| Pik3r3                 | 18710 phosphatidylinositol 3 kinase, regulatory subu        | 1456482_at                    | down       | 2,3283641 |           |
|                        | 9,13E+15                                                    | 74564 hypothetical 9130022E09 | 1429344_at | down      | 2,3269875 |
| Ryr3                   | 20192 ryanodine receptor 3                                  | 1427427_at                    | down       | 2,3269699 |           |
| Jup                    | 16480 junction plakoglobin                                  | 1426873_s_at                  | down       | 2,326715  |           |
|                        |                                                             | 1459256_at                    | down       | 2,3254886 |           |
| Zswim6                 | 67263 zinc finger, SWIM domain containing 6                 | 1434967_at                    | down       | 2,323782  |           |
| Adamts18               | 208936 a disintegrin-like and metalloproteinase (repro      | 1437574_at                    | down       | 2,3236983 |           |
| Cytsb                  | 432572 cytospin B                                           | 1428794_at                    | down       | 2,3193243 |           |
| Scrn1                  | 69938 secernin 1                                            | 1439500_at                    | down       | 2,3184474 |           |
| Vash1                  | 238328 vasohibin 1                                          | 1445143_at                    | down       | 2,31768   |           |
|                        |                                                             | 1441494_at                    | down       | 2,3162305 |           |
| Palm2                  | 242481 paralemmin 2                                         | 1441055_at                    | down       | 2,3127651 |           |
| Dsc3                   | 13507 desmocollin 3                                         | 1434534_at                    | down       | 2,3107224 |           |
| Ctnd2 /// LOC100045979 | 100045979 ///catenin (cadherin associated protein), delta 2 | 1422592_at                    | down       | 2,3086753 |           |
| Cdh2                   | 12558 cadherin 2                                            | 1449244_at                    | down       | 2,307371  |           |
| Casp3                  | 12367 caspase 3                                             | 1426165_a_at                  | down       | 2,3066244 |           |
| Fkbp4 /// LOC100048743 | 100048743 ///FK506 binding protein 4 /// similar to FK506 b | 1416363_at                    | down       | 2,303621  |           |
| Tcf4                   | 21413 transcription factor 4                                | 1416723_at                    | down       | 2,30147   |           |
| Wisp1                  | 22402 WNT1 inducible signaling pathway protein 1            | 1448593_at                    | down       | 2,2998898 |           |
| Gpr110                 | 77596 G protein-coupled receptor 110                        | 1421443_at                    | down       | 2,2993371 |           |
| B4galt6                | 56386 UDP-Gal:betaGlcNAc beta 1,4-galactosyltrans           | 1460329_at                    | down       | 2,2970335 |           |
| Reep1                  | 52250 receptor accessory protein 1                          | 1433509_s_at                  | down       | 2,2955985 |           |
| Slc1a1                 | 20510 solute carrier family 1 (neuronal/epithelial hig      | 1448299_at                    | down       | 2,291797  |           |
| Spred1                 | 114715 sprouty protein with EVH-1 domain 1, related         | 1423160_at                    | down       | 2,2871258 |           |
| Adamts16               | 271127 a disintegrin-like and metalloproteinase (repro      | 1439604_at                    | down       | 2,2856505 |           |
| Ccr11                  | 252837 Chemokine (C-C motif) receptor-like 1 (Ccr11)        | 1437669_x_at                  | down       | 2,2835176 |           |
| Gprasp2                | 245607 G protein-coupled receptor associated sorting        | 1434073_at                    | down       | 2,2821696 |           |
| Cdkn1a                 | 12575 cyclin-dependent kinase inhibitor 1A (P21)            | 1421679_a_at                  | down       | 2,2799683 |           |
| Hoxd9                  | 15438 homeo box D9                                          | 1419126_at                    | down       | 2,2796304 |           |
| 3010003L21Rik          | 109163 RIKEN cDNA 3010003L21 gene                           | 1415875_at                    | down       | 2,279397  |           |

|               |                                                                                  |              |      |           |
|---------------|----------------------------------------------------------------------------------|--------------|------|-----------|
| B930068K11Rik | 320622 RIKEN cDNA B930068K11 gene                                                | 1440462_at   | down | 2,2768042 |
| Tnfrsf21      | 94185 tumor necrosis factor receptor superfamily, member 2                       | 1422740_at   | down | 2,2724097 |
| Zfp618        | 72701 zinc fingerprotein 618                                                     | 1436190_at   | down | 2,2702627 |
| Apcdd1        | 494504 adenomatosis polyposis coli down-regulated 1                              | 1437604_x_at | down | 2,2671897 |
| Drp2          | 13497 dystrophin related protein 2                                               | 1445949_at   | down | 2,2644033 |
| 2900027M19Rik | 72880 RIKEN cDNA 2900027M19 gene                                                 | 1441224_at   | down | 2,263004  |
| Zfp618        | 72701 zinc fingerprotein 618                                                     | 1431703_at   | down | 2,2618806 |
|               |                                                                                  | 1453247_at   | down | 2,2607975 |
|               |                                                                                  | 1457577_at   | down | 2,2606409 |
| C79607        | 98149 expressed sequence C79607                                                  | 1457761_at   | down | 2,260211  |
| Tspan2        | 70747 tetraspanin 2                                                              | 1424567_at   | down | 2,2597957 |
| Kcnk2         | 16526 potassium channel, subfamily K, member 2                                   | 1449158_at   | down | 2,259623  |
| 2900011L18Rik | 77082 RIKEN cDNA 2900011L18 gene                                                 | 1432757_at   | down | 2,2567816 |
| Kcnj2         | 16518 potassium inwardly-rectifying channel, subfamily J, member 2               | 1450503_at   | down | 2,2537282 |
| Fam181b       | 58238 family with sequence similarity 181, member 1                              | 1442800_x_at | down | 2,2509394 |
| Hs3st6        | 328779 heparan sulfate (glucosamine) 3-O-sulfotransferase 6                      | 1459646_at   | down | 2,2497663 |
| Tex9          | 21778 testis expressed gene 9                                                    | 1453360_a_at | down | 2,2478886 |
| 5330421C15Rik | 78279 RIKEN cDNA 5330421C15 gene                                                 | 1454418_at   | down | 2,2470753 |
| Fzd3          | 14365 frizzled homolog 3 (Drosophila)                                            | 1438101_at   | down | 2,2465222 |
|               |                                                                                  | 1458555_at   | down | 2,2463646 |
| Pdgfc         | 54635 platelet-derived growth factor, C polypeptide                              | 1419123_a_at | down | 2,2462776 |
| Fam107b       | 66540 family with sequence similarity 107, member 1                              | 1416892_s_at | down | 2,2446644 |
| Col7a1        | 12836 collagen, type VII, alpha 1                                                | 1419613_at   | down | 2,2415502 |
| Mboat2        | 67216 membrane bound O-acyltransferase domain containing 2                       | 1425029_a_at | down | 2,240537  |
| Fryl          | 72313 furry homolog-like (Drosophila)                                            | 1415758_at   | down | 2,239192  |
| Vipr2         | 22355 vasoactive intestinal peptide receptor 2                                   | 1421391_at   | down | 2,2387733 |
| Prlr          | 19116 prolactin receptor                                                         | 1425853_s_at | down | 2,2348492 |
|               |                                                                                  | 1442270_at   | down | 2,230609  |
| Tubb2b        | 73710 tubulin, beta 2B                                                           | 1452679_at   | down | 2,2287588 |
| Sgip1         | 73094 SH3-domain GRB2-like (endophilin) interacting protein 1                    | 1425181_at   | down | 2,2251518 |
| Nptx1         | 18164 neuronal pentraxin 1                                                       | 1434877_at   | down | 2,223054  |
| Actg2         | 11468 actin, gamma 2, smooth muscle, enteric                                     | 1422340_a_at | down | 2,222816  |
| Cdkn1a        | 12575 cyclin-dependent kinase inhibitor 1A (P21)                                 | 1424638_at   | down | 2,2193627 |
| Ndst1         | 15531 N-deacetylase/N-sulfotransferase (heparan glycosaminoglycan 6-O-sulfate) 1 | 1445505_at   | down | 2,2166483 |
| Tcf4          | 21413 transcription factor 4                                                     | 1434148_at   | down | 2,216345  |
| Tcf4          | 21413 transcription factor 4                                                     | 1416724_x_at | down | 2,213515  |
| Spred1        | 114715 sprouty protein with EVH-1 domain 1, related 1                            | 1423162_s_at | down | 2,212618  |
| Pde9a         | 18585 phosphodiesterase 9A                                                       | 1449403_at   | down | 2,212482  |
| Lass6         | 241447 LAG1 homolog, ceramide synthase 6, mRNA (transcript variant 1)            | 1440246_at   | down | 2,2088761 |
| 5330421C15Rik | 78279 RIKEN cDNA 5330421C15 gene                                                 | 1457705_at   | down | 2,20796   |
| Sft2d2        | 108735 SFT2 domain containing 2                                                  | 1425026_at   | down | 2,206463  |
| AU015680      | 552875 expressed sequence AU015680                                               | 1444674_at   | down | 2,201588  |
|               |                                                                                  | 1440396_at   | down | 2,2005863 |
| Amot          | 27494 angiominin                                                                 | 1454890_at   | down | 2,1999304 |
| Mllt3         | 70122 myeloid/lymphoid or mixed-lineage leukemia 3                               | 1431890_a_at | down | 2,1998434 |
| Mef2c         | 17260 myocyte enhancer factor 2C                                                 | 1421028_a_at | down | 2,1998043 |
| Entpd1        | 12495 ectonucleoside triphosphate diphosphohydrolase 1                           | 1423326_at   | down | 2,1989932 |
| Krt17         | 16667 keratin 17                                                                 | 1423227_at   | down | 2,196449  |
| Cep70         | 68121 centrosomal protein 70                                                     | 1430231_a_at | down | 2,1962893 |
| Phf2          | 68770 putative homeodomain transcription factor 2                                | 1437637_at   | down | 2,1955676 |
| Tcf4          | 21413 transcription factor 4                                                     | 1434149_at   | down | 2,1893492 |
| Irf6          | 54139 interferon regulatory factor 6                                             | 1418301_at   | down | 2,1893296 |
| Amot          | 27494 angiominin                                                                 | 1427584_at   | down | 2,1882467 |
|               |                                                                                  | 1441463_at   | down | 2,1869457 |
| Pttg1         | 30939 pituitary tumor-transforming gene 1                                        | 1419620_at   | down | 2,1868606 |
| Il17rd        | 171463 interleukin 17 receptor D                                                 | 1429893_at   | down | 2,1867282 |
| Zbtb20        | 56490 zinc finger and BTB domain containing 20                                   | 1437065_at   | down | 2,185984  |
| Slc25a24      | 229731 solute carrier family 25 (mitochondrial carrier) member 24                | 1452717_at   | down | 2,1816816 |
| Tmem132c      | 208213 transmembrane protein 132C                                                | 1438698_at   | down | 2,181436  |
| Kcnk1         | 16525 potassium channel, subfamily K, member 1                                   | 1448690_at   | down | 2,179772  |
|               |                                                                                  | 1442393_at   | down | 2,1753166 |
|               |                                                                                  | 1447488_at   | down | 2,174129  |
| Pon2          | 330260 paraoxonase 2                                                             | 1429019_s_at | down | 2,1683497 |
| Myo18a        | 360013 myosin XVIIIa                                                             | 1451422_at   | down | 2,167098  |
| Runx1t1       | 12395 Runt-related transcription factor 1; translocated to chromosome 11         | 1440310_at   | down | 2,1662521 |
| Fam60a        | 56306 family with sequence similarity 60, member A                               | 1448126_at   | down | 2,164616  |
| Neb1          | 74103 nebulin                                                                    | 1438452_at   | down | 2,161714  |
| Slc25a27      | 74011 Solute carrier family 25, member 27 (Slc25a27)                             | 1440090_at   | down | 2,1569333 |
|               |                                                                                  | 1443289_at   | down | 2,15682   |
| Trp63         | 22061 transformation related protein 63                                          | 1418158_at   | down | 2,156683  |
| Casp3         | 12367 caspase 3                                                                  | 1449839_at   | down | 2,1556518 |
| Dtx4          | 207521 deltex 4 homolog (Drosophila)                                             | 1436545_at   | down | 2,1541426 |
|               |                                                                                  | 1440416_at   | down | 2,1515746 |
| Ednrb         | 13618 endothelin receptor type B                                                 | 1426314_at   | down | 2,1513574 |

|                        |                                                               |              |      |           |
|------------------------|---------------------------------------------------------------|--------------|------|-----------|
| BC059841               |                                                               | 1443983_at   | down | 2,149415  |
| Rnf157                 | 407813 cDNA sequence BC059841                                 | 1458544_at   | down | 2,148392  |
|                        | 217340 ring finger protein 157                                | 1434902_at   | down | 2,145635  |
|                        |                                                               | 1439734_at   | down | 2,144602  |
|                        |                                                               | 1443231_at   | down | 2,1441805 |
| Aspm                   | 12316 asp (abnormal spindle)-like, microcephaly ass           | 1458560_at   | down | 2,1419883 |
|                        |                                                               | 1460531_at   | down | 2,1340663 |
| Bcl11a                 | 14025 B-cell CLL/lymphoma 11A (zinc finger protein            | 1426552_a_at | down | 2,1335917 |
| Sft2d2                 | 108735 SFT2 domain containing 2                               | 1425027_s_at | down | 2,1332662 |
| 5730507A09Rik          | 70638 RIKEN cDNA 5730507A09 gene                              | 1433945_at   | down | 2,1329582 |
| Tcf4                   | 21413 transcription factor 4                                  | 1424089_a_at | down | 2,1325438 |
| Ptpn14                 | 19250 protein tyrosine phosphatase, non-receptor ty           | 1436442_at   | down | 2,128153  |
| Odz2                   | 23964 odd Oz/ten-m homolog 2 (Drosophila)                     | 1420718_at   | down | 2,1248674 |
|                        |                                                               | 1421534_at   | down | 2,121648  |
| Tpd52                  | 21985 tumor protein D52                                       | 1419493_a_at | down | 2,1209803 |
| Wasf1                  | 83767 WASP family 1                                           | 1418545_at   | down | 2,1189039 |
| Nkd2                   | 72293 naked cuticle 2 homolog (Drosophila)                    | 1419465_at   | down | 2,1183846 |
| Plscr1                 | 22038 phospholipid scramblase 1                               | 1429527_a_at | down | 2,116541  |
| Cacna1b                | 12287 calcium channel, voltage-dependent, N type,             | 1436602_x_at | down | 2,1139188 |
| Etl4                   | 208618 enhancer trap locus 4                                  | 1432266_at   | down | 2,1132562 |
| Tpm2                   | 22004 tropomyosin 2, beta                                     | 1449577_x_at | down | 2,1116247 |
| D330050I23Rik          | 399603 RIKEN cDNA D330050I23 gene                             | 1434301_at   | down | 2,1096816 |
| Sft2d2                 | 108735 SFT2 domain containing 2                               | 1435142_at   | down | 2,1096764 |
| Pgm21                  | 70974 phosphoglucomutase 2-like 1                             | 1438774_s_at | down | 2,1096015 |
| Rnf144b                | 218215 ring finger protein 144B                               | 1425282_at   | down | 2,108766  |
| Myo1e                  | 71602 myosin IE                                               | 1428509_at   | down | 2,1072545 |
| AU020094               | 105596 expressed sequence AU020094                            | 1455172_at   | down | 2,106962  |
| 4932437C15Rik          | 74380 RIKEN cDNA 4932437C15 gene                              | 1432881_at   | down | 2,1055777 |
| Fam49b                 | 223601 family with sequence similarity 49, member B           | 1436088_at   | down | 2,1031208 |
| Egflam                 | 268780 EGF-like, fibronectin type III and laminin G dc        | 1434647_at   | down | 2,1019144 |
| Crybg3                 | 224273 beta-gamma crystallin domain containing 3              | 1434410_at   | down | 2,101042  |
| Pde7b                  | 29863 phosphodiesterase 7B                                    | 1450213_at   | down | 2,101029  |
| Sms                    | 20603 Spermine synthase (Sms), mRNA                           | 1434190_at   | down | 2,0984173 |
|                        |                                                               | 1443042_at   | down | 2,095779  |
| E230012J19Rik          | 319664 RIKEN cDNA E230012J19 gene                             | 1458156_at   | down | 2,0936668 |
| Shisa2                 | 219134 shisa homolog 2 (Xenopus laevis)                       | 1423852_at   | down | 2,092647  |
| Ctxn1                  | 330695 cortexin 1                                             | 1435083_at   | down | 2,0911677 |
|                        |                                                               | 1453788_at   | down | 2,089681  |
| Samd5                  | 320825 sterile alpha motif domain containing 5                | 1437403_at   | down | 2,0894613 |
| Fzd3                   | 14365 frizzled homolog 3 (Drosophila)                         | 1450135_at   | down | 2,08882   |
| EG623112 /// Stmn1     | 16765 /// 623 predicted gene, EG623112 /// stathmin 1         | 1448113_at   | down | 2,0851233 |
|                        |                                                               | 1438310_at   | down | 2,084721  |
| Sdc1                   | 20969 syndecan 1                                              | 1415944_at   | down | 2,08385   |
| Chml                   | 12663 choroideremia-like                                      | 1435926_at   | down | 2,0834217 |
| Stmn1                  | 16765 stathmin 1                                              | 1415849_s_at | down | 2,0833745 |
| Tns3                   | 319939 tensin 3                                               | 1455333_at   | down | 2,0826979 |
| Cdc21b                 | 78334 cell division cycle 2-like 6 (CDK8-like)                | 1455031_at   | down | 2,0823557 |
| Cenpf                  | 108000 centromere protein F                                   | 1427161_at   | down | 2,0815115 |
| E430022K19Rik          | 320086 RIKEN cDNA E430022K19 gene                             | 1440072_at   | down | 2,0806162 |
| Clca1 /// Clca2        | 12722 /// 807 chloride channel calcium activated 1 /// chlori | 1460259_s_at | down | 2,0805821 |
| Fam65b                 | 193385 family with sequence similarity 65, member B           | 1453837_at   | down | 2,0801558 |
|                        |                                                               | 1446230_at   | down | 2,0791948 |
|                        |                                                               | 1437916_at   | down | 2,078198  |
| Cdh13                  | 12554 cadherin 13                                             | 1434115_at   | down | 2,0775642 |
| 2010011I20Rik          | 67017 RIKEN cDNA 2010011I20 gene                              | 1424695_at   | down | 2,0774949 |
|                        |                                                               | 1441461_at   | down | 2,0761251 |
| Ccnj1                  | 380694 cyclin J-like                                          | 1459978_x_at | down | 2,0760589 |
|                        |                                                               | 1455344_at   | down | 2,0744314 |
| Sox9                   | 20682 SRY-box containing gene 9                               | 1424950_at   | down | 2,0740557 |
| Spsb4                  | 211949 spIA/ryanodine receptor domain and SOCS bc             | 1451418_a_at | down | 2,0733273 |
|                        |                                                               | 1441517_at   | down | 2,070923  |
| Apcdd1                 | 494504 adenomatosis polyposis coli down-regulated 1           | 1454822_x_at | down | 2,0703459 |
|                        |                                                               | 1456209_x_at | down | 2,069197  |
|                        |                                                               | 1440903_at   | down | 2,0670555 |
| Sostdc1                | 66042 sclerostin domain containing 1                          | 1460250_at   | down | 2,066888  |
| D430019H16Rik          | 268595 RIKEN cDNA D430019H16 gene                             | 1455447_at   | down | 2,0639782 |
| Dgkh                   | 380921 diacylglycerol kinase, eta                             | 1457213_a_at | down | 2,062617  |
| Slco5a1                | 240726 solute carrier organic anion transporter family        | 1439588_at   | down | 2,0618925 |
| Rgnef                  | 110596 Rho-guanine nucleotide exchange factor                 | 1419457_at   | down | 2,0590491 |
| Abhd6                  | 66082 abhydrolase domain containing 6                         | 1419103_a_at | down | 2,055367  |
| Ednra                  | 13617 endothelin receptor type A                              | 1451691_at   | down | 2,0545623 |
|                        |                                                               | 1458537_at   | down | 2,053818  |
|                        |                                                               | 1456661_at   | down | 2,0532918 |
| LOC100048050 /// Lphn2 | 100048050 /// similar to calcium-independent alpha-latrotox   | 1444906_at   | down | 2,0524287 |

|               |           |                                                      |              |      |           |
|---------------|-----------|------------------------------------------------------|--------------|------|-----------|
| Kctd1         | 106931    | potassium channel tetramerisation domain co          | 1422293_a_at | down | 2,0519454 |
| Ednra         | 13617     | endothelin receptor type A                           | 1433525_at   | down | 2,0516608 |
| Lrig1         | 16206     | leucine-rich repeats and immunoglobulin-like         | 1434210_s_at | down | 2,0493374 |
| Tle4          | 21888     | transducin-like enhancer of split 4, homolog c       | 1450853_at   | down | 2,0489664 |
| Edn3          | 13616     | endothelin 3                                         | 1441924_x_at | down | 2,0481906 |
| Hmga2         | 15364     | high mobility group AT-hook 2                        | 1450781_at   | down | 2,0472178 |
|               |           |                                                      | 1459906_at   | down | 2,0449865 |
| Etl4          | 208618    | enhancer trap locus 4                                | 1457147_at   | down | 2,0438077 |
| Agrn          | 11603     | agrln                                                | 1443980_at   | down | 2,042774  |
| Mex3a         | 72640     | mex3 homolog A (C. elegans)                          | 1455529_at   | down | 2,0420113 |
| Otud7a        | 170711    | OTU domain containing 7A (Otud7a), mRNA              | 1438286_at   | down | 2,040725  |
| Camta1        | 100072    | calmodulin binding transcription activator 1         | 1433971_at   | down | 2,039872  |
| Alx4          | 11695     | aristaless-like homeobox 4                           | 1421737_at   | down | 2,0397582 |
| Mreg          | 381269    | melanoregulin                                        | 1437250_at   | down | 2,0386143 |
| Fez1          | 235180    | fasciculation and elongation protein zeta 1 (z)      | 1454674_at   | down | 2,0384018 |
| Grhl2         | 252973    | grainyhead-like 2 (Drosophila)                       | 1429086_at   | down | 2,038247  |
| Cep70         | 68121     | centrosomal protein 70                               | 1422653_at   | down | 2,0382106 |
| Cyp26b1       | 232174    | cytochrome P450, family 26, subfamily b, pol         | 1460011_at   | down | 2,0380127 |
| Asl           | 109900    | argininosuccinate lyase                              | 1448350_at   | down | 2,037876  |
| Cd109         | 235505    | CD109 antigen                                        | 1436346_at   | down | 2,0376651 |
| AU042950      | 107306    | expressed sequence AU042950                          | 1458648_at   | down | 2,0368447 |
| Zfp618        | 72701     | zinc fingerprotein 618                               | 1455591_at   | down | 2,036463  |
| Col11a1       | 12814     | collagen, type XI, alpha 1                           | 1418599_at   | down | 2,0350263 |
| Krt15         | 16665     | keratin 15                                           | 1422667_at   | down | 2,0348265 |
|               |           |                                                      | 1443253_at   | down | 2,0320005 |
| Cpsf2         | 51786     | cleavage and polyadenylation specific factor 2       | 1431089_at   | down | 2,030634  |
| Tmem38b       | 52076     | transmembrane protein 38B                            | 1456544_at   | down | 2,0279696 |
| Pde3a         | 54611     | phosphodiesterase 3A, cGMP inhibited                 | 1450284_at   | down | 2,024972  |
| Fam126a       | 84652     | family with sequence similarity 126, member          | 1450724_at   | down | 2,0242426 |
| Fam129a       | 63913     | family with sequence similarity 129, member          | 1422567_at   | down | 2,023488  |
| Dpysl4        | 26757     | dihydropyrimidinase-like 4                           | 1418298_s_at | down | 2,0221665 |
| Rbmx          | 19655     | RNA binding motif protein, X chromosome              | 1416354_at   | down | 2,0216236 |
| Axin2         | 12006     | axin2                                                | 1436845_at   | down | 2,0212426 |
| Atp8a2        | 50769     | ATPase, aminophospholipid transporter-like, c        | 1460294_at   | down | 2,0204237 |
| Pdgfa         | 18590     | platelet derived growth factor, alpha                | 1449187_at   | down | 2,0192535 |
| Myo1b         | 17912     | myosin IB                                            | 1448990_a_at | down | 2,0173988 |
| Tpm2          | 22004     | tropomyosin 2, beta                                  | 1419738_a_at | down | 2,0169108 |
| Gjb3          | 14620     | gap junction protein, beta 3                         | 1416715_at   | down | 2,0167115 |
|               |           |                                                      | 1444620_at   | down | 2,0146978 |
| Spon1         | 233744    | spondin 1, (f-spondin) extracellular matrix pr       | 1424415_s_at | down | 2,0140998 |
| D5Ertd525e    | 52336     | DNA segment, Chr 5, ERATO Doi 525, expres:           | 1443419_at   | down | 2,0133772 |
| Zfp711        | 245595    | zinc finger protein 711                              | 1432750_at   | down | 2,0131595 |
| Megf6         | 230971    | multiple EGF-like-domains 6                          | 1437057_at   | down | 2,012785  |
| Cd9           | 12527     | CD9 antigen                                          | 1416066_at   | down | 2,0116765 |
| 2900026A02Rik | 243219    | RIKEN cDNA 2900026A02 gene                           | 1429089_s_at | down | 2,0106432 |
| Fam65b        | 193385    | family with sequence similarity 65, member B         | 1460555_at   | down | 2,0089526 |
| Fam59a        | 381126    | family with sequence similarity 59, member A         | 1456271_at   | down | 2,0084226 |
| Mtch2         | 56428     | mitochondrial carrier homolog 2 (C. elegans)         | 1438842_at   | down | 2,007356  |
| Ankrd50       | 99696     | ankyrin repeat domain 50                             | 1435880_at   | down | 2,0073507 |
| Fgfr4         | 14186     | fibroblast growth factor receptor 4                  | 1427845_at   | down | 2,0062437 |
| Lemd3         | 380664    | LEM domain containing 3 (Lemd3), mRNA                | 1439587_at   | down | 2,0062237 |
|               | 100042424 | 100042424 PREDICTED: Mus musculus similar to TF-1 ap | 1445929_at   | down | 2,0053694 |
| Palld         | 72333     | palladin, cytoskeletal associated protein            | 1433768_at   | down | 2,0045664 |
| Nrxn2         | 18190     | neurexin II                                          | 1435908_at   | down | 2,0043695 |
| Nol11         | 68979     | nucleolar protein 11                                 | 1439166_at   | down | 2,0030134 |
|               |           |                                                      | 1460117_at   | down | 2,0011382 |
